# Supplementary material for: Sc(OTf)3-catalyzed diastereoselective Friedel–Crafts reactions of arenes and hetarenes with 3-phenylglycidates
Source: Royal Society of Chemistry journal article supplement (doi:10.1039/c2ob25988e), 2012-01-01

Supplementary Information for:

**Sc(OTf)<sub>3</sub>-catalyzed diastereoselective Friedel-Crafts reactions of arenes and  
hetarenes with 3-phenylglycidates**

*David Wilcke, Thorsten Bach\**

Department Chemie and Catalysis Research Center (CRC), Technische Universität München,  
Lichtenbergstr. 4, D-85747 Garching

thorsten.bach@ch.tum.de

## Content

|                                                                |              |
|----------------------------------------------------------------|--------------|
| <b>1. General</b>                                              | <b>3</b>     |
| <b>2. Substrate Synthesis</b>                                  | <b>4-11</b>  |
| <b>3. Diastereoselective <i>Friedel-Crafts</i> Alkylations</b> | <b>12-24</b> |
| <b>4. Determination of the relative configuration</b>          | <b>25-28</b> |
| <b>5. References</b>                                           | <b>29</b>    |
| <b>6. <sup>1</sup>H- and <sup>13</sup>C-NMR spectra</b>        | <b>30-43</b> |

## 1. General

All reactions involving moisture-sensitive chemicals were carried out in flame-dried glassware in dried solvents with magnetic stirring under argon. Diethyl ether (Et<sub>2</sub>O) and dichloromethane (CH<sub>2</sub>Cl<sub>2</sub>) were purified by using a SPS-800 solvent purification system (M. Braun). All other chemicals were used as received. TLC was performed on silica coated glass plates (silica gel 60 F<sub>254</sub>) with detection by UV (254 nm) or ceric ammonium molybdate (CAM) with subsequent heating. Flash chromatography was performed on silica gel 60 (Merck, 230-400 mesh) with the indicated eluent. All solvents for chromatography [Pentane (P) and diethyl ether (Et<sub>2</sub>O)] were distilled prior to use. IR-spectra were recorded on a JASCO IR-4100 (ATR), MS/HRMS-measurements were performed on a Finnigan MAT 8200 (EI), a Finnigan MAT 95S (HR-EI), a Finnigan LCQ classic (ESI) and a Thermo Scientific LTQ Orbitrap XL (HRMS-ESI). <sup>1</sup>H- and <sup>13</sup>C-NMR-spectra were recorded in CDCl<sub>3</sub> at 303 K either on a Bruker AV-250, a Bruker AV-360 or a Bruker AV-500 spectrometer. The chemical shifts are reported relative to CHCl<sub>3</sub> (δ = 7.26 ppm). Apparent multiplets that occur as a result of the accidental equality of coupling constants to those of magnetically nonequivalent protons are marked as virtual (*virt*). The multiplicities of the <sup>13</sup>C-NMR signal were determined by DEPT experiments, assignments are based on COSY, HMBC and HMQC experiments. Melting points were measured on a Koffler Thermopan and are uncorrected. Elemental analyses were carried out on a Elementar Vario EL in the Department Chemie at the Technische Universität München.

## 2. Substrate Synthesis

### General procedure 1: *Darzens* reactions for the synthesis of compounds *trans-2a-c*

Methanol (150 mL) was carefully added to sodium (3.45 g, 150 mmol, 1.50 eq.) under an atmosphere of argon at 0 °C. After the complete dissolution of sodium, a mixture of the respective aldehyde (100 mmol, 1.00 eq.) and ethyl chloroacetate (16.0 mL, 150 mmol, 1.50 eq.) was added slowly to the alkoxide solution. The reaction mixture was stirred at ambient temperature over night, subsequently neutralised with glacial acetic acid and poured into ice water (500 mL). The mixture was extracted with CH<sub>2</sub>Cl<sub>2</sub> (3 × 300 mL). The combined organic layers were dried over Na<sub>2</sub>SO<sub>4</sub>, filtered and concentrated *in vacuo*. The crude product was purified under the given conditions.

### Methyl 3-(4-methoxyphenyl)oxirane-2-carboxylate (*trans-2a*)<sup>[1]</sup>

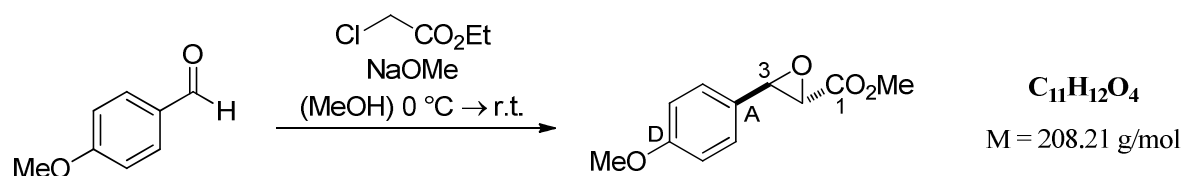

Following the **general procedure 1**, reaction of *p*-anisaldehyde (12.2 mL, 100 mmol, 1.00 eq.) and purification of the crude product by recrystallization from methanol yielded *trans-2a* (8.21 g, 39.4 mmol, 39%) as a colourless solid (d.r. *trans/cis* > 95/5).

**TLC:**  $R_f = 0.34$  (P/Et<sub>2</sub>O = 2/1) [UV, CAM].

*trans*-Diastereoisomer:

**<sup>1</sup>H-NMR** (500 MHz, CDCl<sub>3</sub>):  $\delta$  [ppm] = 3.51 (d, <sup>3</sup>*J* = 1.8 Hz, 1 H, H-2), 3.81 (s, 3 H, H<sub>D</sub>-OMe), 3.82 (s, 3 H, COOMe), 4.05 (d, <sup>3</sup>*J* = 1.8 Hz, 1 H, H-3), 6.88-6.90 (m, 2 H, H-C), 7.20-7.22 (m, 2 H, H-B).

**<sup>13</sup>C-NMR** (90.6 MHz, CDCl<sub>3</sub>):  $\delta$  [ppm] = 52.5 (q, COOMe), 55.3 (q, C<sub>D</sub>-OMe), 56.5 (d, C-2), 57.9 (d, C-3), 114.1 (d, C-C), 126.7 (s, C-A), 127.2 (d, C-B), 160.2 (s, C-D), 168.8 (s, C-1).

**MS** (EI, 70 eV):  $m/z$  (%) = 208 (25) [M<sup>+</sup>], 121 (100) [(M-C<sub>3</sub>H<sub>3</sub>O<sub>3</sub>)<sup>+</sup>].

### Methyl 3-phenyloxirane-2-carboxylate (*trans*-2b)<sup>[2]</sup>

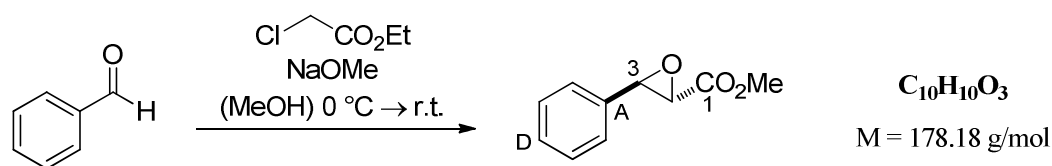

Following the **general procedure 1**, reaction of benzaldehyde (10.1 mL, 100 mmol, 1.00 eq.) and purification of the crude product by flash chromatography (P/Et<sub>2</sub>O = 9/1 → 2/1) yielded *trans*-**2b** (8.03 g, 45.1 mmol, 45%) as a colourless solid (d.r. *trans/cis* > 95/5).

**TLC:**  $R_f$  = 0.60 (P/Et<sub>2</sub>O = 1/1) [UV, CAM].

*trans*-Diastereoisomer:

**<sup>1</sup>H-NMR** (360 MHz, CDCl<sub>3</sub>):  $\delta$  [ppm] = 3.52 (d, <sup>3</sup> $J$  = 1.7 Hz, 1 H, H-2), 3.83 (s, 3 H, COOMe), 4.10 (d, <sup>3</sup> $J$  = 1.7 Hz, 1 H, H-3), 7.28-7.31 (m, 2 H, H-B), 7.35-7.38 (m, 3 H, H-C + H-D).

**<sup>13</sup>C-NMR** (90.6 MHz, CDCl<sub>3</sub>):  $\delta$  [ppm] = 52.6 (q, COOMe), 56.6 (d, C-2), 58.0 (d, C-3), 125.8 (d, C-B), 128.7 (d, C-C), 129.0 (d, C-D), 134.9 (s, C-A), 168.6 (s, C-1).

**MS** (ESI):  $m/z$  (%) = 357 [(2M+H)<sup>+</sup>].

### Methyl 3-(*p*-tolyl)oxirane-2-carboxylate (*trans*-2c)<sup>[2]</sup>

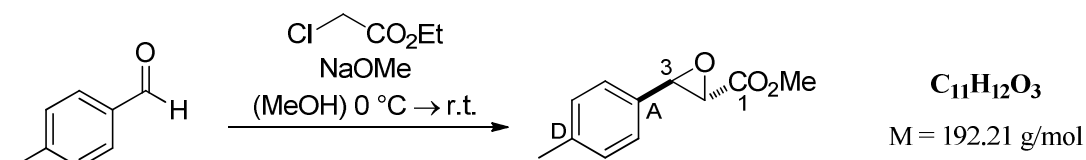

Following the **general procedure 1**, reaction of *p*-tolualdehyde (11.8 mL, 100 mmol, 1.00 eq.) and purification of the crude product by flash chromatography (P/Et<sub>2</sub>O = 8/1 → 2/1) yielded *trans*-**2c** (10.8 g, 56.2 mmol, 56%) as a colourless solid (d.r. *trans/cis* > 95/5).

**TLC:**  $R_f$  = 0.63 (P/Et<sub>2</sub>O = 1/1) [UV, CAM].

*trans*-Diastereoisomer:

**<sup>1</sup>H-NMR** (500 MHz, CDCl<sub>3</sub>):  $\delta$  [ppm] = 2.36 (s, 3 H, H<sub>D</sub>-Me), 3.51 (d, <sup>3</sup> $J$  = 1.8 Hz, 1 H, H-2), 3.83 (s, 3 H, COOMe), 4.07 (d, <sup>3</sup> $J$  = 1.8 Hz, 1 H, H-3), 7.17-7.7.18 (m, 4 H, H-B+H-C).

**<sup>13</sup>C-NMR** (90.6 MHz, CDCl<sub>3</sub>):  $\delta$  [ppm] = 21.2 (q, C<sub>D</sub>-Me), 52.6 (q, COOMe), 56.6 (d, C-2), 58.0 (d, C-3), 125.8 (d, C-B), 129.3 (d, C-C), 131.8 (s, C-A), 139.0 (s, C-D), 168.8 (s, C-1).

MS (ESI):  $m/z$  (%) = 385 (100) [(2M+H)<sup>+</sup>].

**Methyl 2,3-dihydroxy-3-(4-methoxyphenyl)propanoate**<sup>[3,4]</sup>

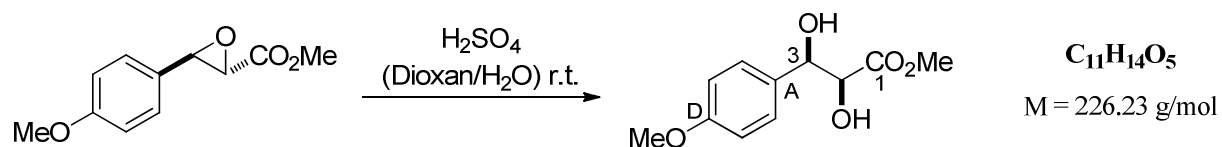

Methyl 3-(4-methoxyphenyl)oxirane-2-carboxylate (*trans*-**2a**) (2.08 g, 10.0 mmol, d.r. *trans/cis* > 95/5, 1.00 eq.) was dissolved in dioxane (60 mL) and water (15 mL). Conc. H<sub>2</sub>SO<sub>4</sub> (250 μL, 4.69 mmol, 0.47 eq.) was added and the reaction mixture was stirred at ambient temperature over night. The solution was concentrated *in vacuo* and sat. aqueous NaHCO<sub>3</sub> (40 mL) and CH<sub>2</sub>Cl<sub>2</sub> (40 mL) were subsequently added. The layers were separated and the aqueous layer was extracted with CH<sub>2</sub>Cl<sub>2</sub> (2 × 40 mL). The combined organic layers were dried over Na<sub>2</sub>SO<sub>4</sub>, filtered and concentrated *in vacuo*. The crude product was purified by flash chromatography [P/Et<sub>2</sub>O = 1/1 → Et<sub>2</sub>O (100%)] to afford 1.94 g (8.57 mmol, 86%) of methyl 2,3-dihydroxy-3-(4-methoxyphenyl)propanoate as a colourless solid (d.r. *anti/syn* = 32/68).

TLC:  $R_f$  = 0.14 (P/Et<sub>2</sub>O = 1/3) [UV, CAM].

*anti*-Diastereoisomer:

<sup>1</sup>H-NMR (250 MHz, CDCl<sub>3</sub>): δ [ppm] = 3.10 (bs, 2 H, OH), 3.71 (s, 3 H, COOMe), 3.80 (s, 3 H, H<sub>D</sub>-OMe), 4.47 (d, <sup>3</sup>J = 4.4 Hz, 1 H, H-2), 4.94 (d, <sup>3</sup>J = 4.4 Hz, 1 H, H-3), 6.86-6.89 (m, 2 H, H-C), 7.22-7.26 (m, 2 H, H-B).

<sup>13</sup>C-NMR (90.6 MHz, CDCl<sub>3</sub>): δ [ppm] = 52.4 (q, COOMe), 55.2 (q, C<sub>D</sub>-OMe), 74.6 (d, C-3), 74.7 (d, C-2), 113.8 (d, C-C), 127.6 (d, C-B), 130.7 (s, C-A), 159.5 (s, C-D), 172.5 (s, C-1).

*syn*-Diastereoisomer:

<sup>1</sup>H-NMR (250 MHz, CDCl<sub>3</sub>): δ [ppm] = 2.70 (bs, 1 H, OH), 2.88 (bs, 1 H, OH), 3.81 (s, 6 H, COOMe + H<sub>D</sub>-OMe), 4.34 (d, <sup>3</sup>J = 2.9 Hz, 1 H, H-2), 4.96 (d, <sup>3</sup>J = 2.9 Hz, 1 H, H-3), 6.88-6.93 (m, 2 H, H-C), 7.30-7.35 (m, 2 H, H-B).

<sup>13</sup>C-NMR (90.6 MHz, CDCl<sub>3</sub>): δ [ppm] = 52.8 (q, COOMe), 55.3 (q, C<sub>D</sub>-OMe), 74.1 (d, C-3), 74.7 (d, C-2), 113.9 (d, C-C), 127.5 (d, C-B), 132.0 (s, C-A), 159.4 (s, C-D), 173.2 (s, C-1).

MS (EI, 70 eV):  $m/z$  (%) = 226 (1) [M<sup>+</sup>], 208 (2) [(M-H<sub>2</sub>O)<sup>+</sup>], 170 (9), 137 (100) [(M-C<sub>3</sub>H<sub>5</sub>O<sub>3</sub>)<sup>+</sup>], 77 (34).

### Methyl 3-hydroxy-3-(4-methoxyphenyl)-2-(tosyloxy)propanoate<sup>[3,5]</sup>

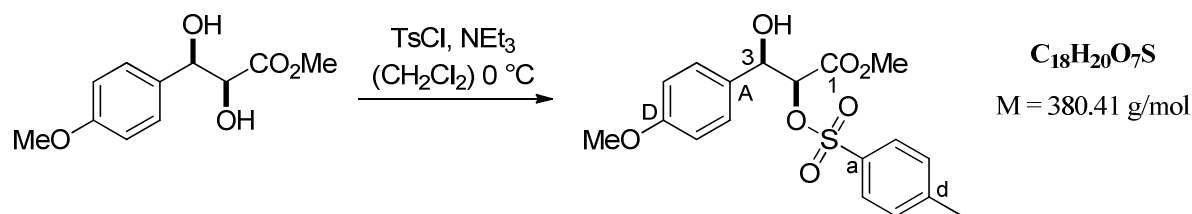

Methyl 2,3-dihydroxy-3-(4-methoxyphenyl)propanoate (1.64 g, 7.25 mmol, d.r. *anti/syn* = 32/68, 1.00 eq.) was dissolved in  $\text{CH}_2\text{Cl}_2$  (40 mL) and cooled to 0 °C.  $\text{NEt}_3$  (1.51 mL, 10.9 mmol, 1.50 eq.) and *p*-toluenesulfonyl chloride (1.42 g, 7.47 mmol, 1.03 eq.) were subsequently added and the solution was stirred for 60 h at 0 °C. The mixture was poured into ice water (50 mL) and the layers were separated. The aqueous layer was extracted with  $\text{CH}_2\text{Cl}_2$  (3 × 40 mL). The combined organic layers were dried over  $\text{Na}_2\text{SO}_4$ , filtered and concentrated *in vacuo*. The crude product was purified by flash chromatography (P/Et<sub>2</sub>O = 1/1 → 1/3) to afford 1.69 g (4.44 mmol, 61%) of methyl 3-hydroxy-3-(4-methoxyphenyl)-2-(tosyloxy)propanoate as a colourless solid (d.r. *anti/syn* = 7/93).

**TLC:**  $R_f = 0.22$  (P/Et<sub>2</sub>O = 1/3) [UV, CAM].

*syn*-Diastereoisomer:

**<sup>1</sup>H-NMR** (500 MHz,  $\text{CDCl}_3$ ):  $\delta$  [ppm] = 2.41 (s, 3 H, H<sub>d</sub>-Me), 2.48 (bs, 1 H, OH), 3.59 (s, 3 H, COOMe), 3.78 (s, 3 H, H<sub>D</sub>-OMe), 4.86 (d, <sup>3</sup>*J* = 4.8 Hz, 1 H, H-2), 5.04 (d, <sup>3</sup>*J* = 4.8 Hz, 1 H, H-3), 6.74-6.76 (m, 2 H, H-C), 7.13-7.14 (m, 2 H, H-B), 7.20-7.22 (m, 2 H, H-c), 7.58-7.60 (m, 2 H, H-b).

**<sup>13</sup>C-NMR** (90.6 MHz,  $\text{CDCl}_3$ ):  $\delta$  [ppm] = 21.6 (q, C<sub>d</sub>-Me), 52.7 (q, COOMe), 55.2 (q, C<sub>D</sub>-OMe), 73.3 (d, C-3), 81.3 (d, C-2), 113.8 (d, C-C), 127.5 (d, C-B), 127.9 (d, C-b), 129.2 (s, C-A), 129.6 (d, C-c), 132.5 (s, C-a), 145.0 (s, C-d), 159.7 (s, C-D), 167.4 (s, C-1).

**MS** (EI, 70 eV):  $m/z$  (%) = 380 (1) [ $\text{M}^+$ ], 313 (19), 171 (100) [( $\text{M}-\text{C}_{11}\text{H}_{13}\text{O}_4$ )<sup>+</sup>], 151 (19), 144 (58), 137 (70).

### Methyl 3-(4-methoxyphenyl)oxirane-2-carboxylate (*cis*-2a)<sup>[3]</sup>

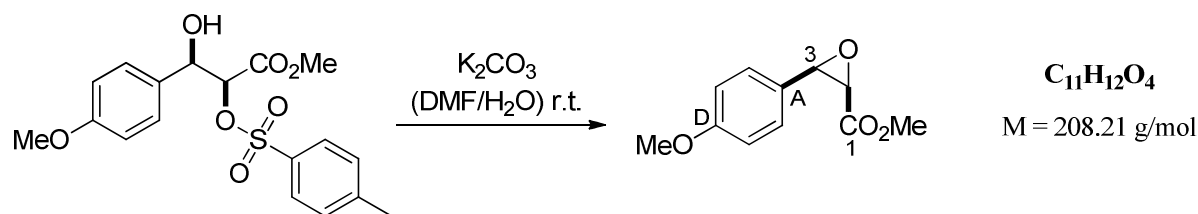

Methyl 3-hydroxy-3-(4-methoxyphenyl)-2-(tosyloxy)propanoate (1.68 g, 4.42 mmol, d.r. *anti/syn* = 7/93, 1.00 eq.) was dissolved in DMF (30 mL) and water (400  $\mu\text{L}$ ).  $\text{K}_2\text{CO}_3$  (1.83 g, 13.4 mmol, 3.00 eq.) was added and the suspension was stirred for 20 h at ambient temperature. The mixture was poured into ice water (50 mL) and EtOAc (50 mL) was added. The layers were separated and the aqueous layer was extracted with EtOAc (3  $\times$  70 mL). The combined organic layers were dried over  $\text{Na}_2\text{SO}_4$ , filtered and concentrated *in vacuo*. The crude product was purified by flash chromatography [P/Et<sub>2</sub>O = 2/1  $\rightarrow$  1/1 + 0.5%  $\text{NEt}_3$ ] to afford 725 mg (3.48 mmol, 79%) of methyl 3-(4-methoxyphenyl)oxirane-2-carboxylate (*cis*-2a) as a colourless solid (d.r. *trans/cis* = 7/93).

*cis*-Diastereoisomer:

<sup>1</sup>H-NMR (500 MHz,  $\text{CDCl}_3$ ):  $\delta$  [ppm] = 3.58 (s, 3 H, COOMe), 3.80 (s, 3 H, H<sub>D</sub>-OMe), 3.81 (d, <sup>3</sup>*J* = 4.5 Hz, 1 H, H-2), 4.21 (d, <sup>3</sup>*J* = 4.5 Hz, 1 H, H-3), 6.86-6.88 (m, 2 H, H-C), 7.33-7.35 (m, 2 H, H-B).

<sup>13</sup>C-NMR (90.6 MHz,  $\text{CDCl}_3$ ):  $\delta$  [ppm] = 52.1 (q, COOMe), 55.2 (q, C<sub>D</sub>-OMe), 56.0 (d, C-2), 57.4 (d, C-3), 113.5 (d, C-C), 124.7 (s, C-A), 127.9 (d, C-B), 159.8 (s, C-D), 167.2 (s, C-1).

### 1-(4-methoxyphenyl)-4,4-dimethylpent-1-en-3-one<sup>[6]</sup>

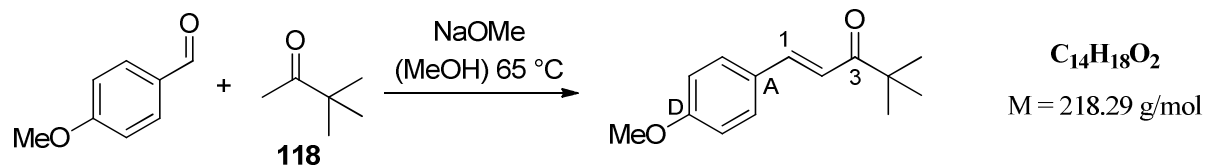

Methanol (50 mL) was carefully added to sodium (1.59 g, 69.0 mmol, 1.15 eq.) under an atmosphere of argon at 0 °C. After the complete dissolution of sodium, a mixture of *p*-anisaldehyde (7.29 mL, 60.0 mmol, 1.00 eq.) and pinacolone 8.26 mL (66.0 mmol, 1.10 eq.) was added slowly to the alkoxide solution. The reaction mixture was heated to reflux for 24 h. After cooling to ambient temperature sat. aqueous  $\text{NH}_4\text{Cl}$  (30 mL) and Et<sub>2</sub>O (60 mL) were added and the layers were separated. The aqueous layer was extracted with Et<sub>2</sub>O (3  $\times$  80 mL).



The combined organic layers were dried over  $\text{Na}_2\text{SO}_4$ , filtered and concentrated *in vacuo*. The crude product was purified by flash chromatography [P/Et<sub>2</sub>O = 8/1 → 4/1] to afford 11.6 g (53.1 mmol, 88%) of 1-(4-methoxyphenyl)-4,4-dimethylpent-1-en-3-one as a yellow oil (d.r. *trans/cis* > 95/5).

**TLC:**  $R_f = 0.53$  (P/Et<sub>2</sub>O = 2/1) [UV, CAM].

*trans*-Diastereoisomer:

**<sup>1</sup>H-NMR** (500 MHz, CDCl<sub>3</sub>):  $\delta$  [ppm] = 1.23 [s, 9 H, C(CH<sub>3</sub>)<sub>3</sub>], 3.84 (s, 3 H, OMe), 6.90-6.92 (m, 2 H, H-C), 7.01 (d, <sup>3</sup>*J* = 15.5 Hz, 1 H, H-2), 7.52-7.54 (m, 2 H, H-B), 7.65 (d, <sup>3</sup>*J* = 15.5 Hz, 1 H, H-1).

**<sup>13</sup>C-NMR** (90.6 MHz, CDCl<sub>3</sub>):  $\delta$  [ppm] = 26.4 [q, C(CH<sub>3</sub>)<sub>3</sub>], 43.1 [s, C(CH<sub>3</sub>)<sub>3</sub>], 55.4 (q, OMe), 114.3 (d, C-C), 118.5 (d, C-2), 127.7 (s, C-A), 130.0 (d, C-B), 142.6 (d, C-1), 161.3 (s, C-D), 204.3 (s, C-3).

**MS** (ESI):  $m/z$  (%) = 219 (100) [(M+H)<sup>+</sup>], 121 (8).

#### 4,4-Dimethyl-1,2-epoxy-1-(4-methoxyphenyl)-pentan-3-one<sup>[6]</sup>

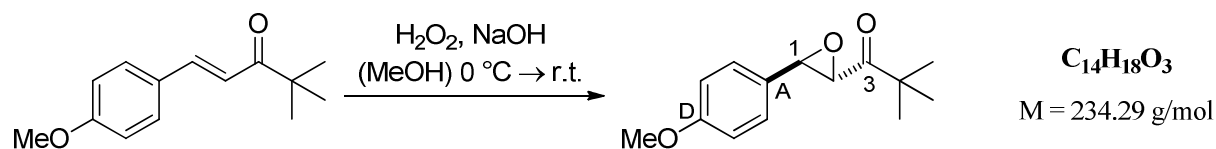

1-(4-methoxyphenyl)-4,4-dimethylpent-1-en-3-one (3.00 g, 13.7 mmol, d.r. *trans/cis* > 95/5, 1.00 eq.) was dissolved in methanol (20 mL) and cooled to 0 °C. H<sub>2</sub>O<sub>2</sub> (3.83 mL, 44.7 mmol, 35% in H<sub>2</sub>O, 3.25 eq.) was added over a period of 5 min and aqueous 2 M NaOH (4.00 mL, 8.00 mmol, 0.58 eq.) was subsequently added over a period of 15 min. The reaction mixture was stirred at ambient temperature over night. Sat. aqueous Na<sub>2</sub>S<sub>2</sub>O<sub>3</sub> (40 mL) was added and the mixture was stirred for 30 min at ambient temperature. The mixture was extracted with Et<sub>2</sub>O (3 × 60 mL). The combined organic layers were dried over Na<sub>2</sub>SO<sub>4</sub>, filtered and concentrated *in vacuo*. The crude product was purified by recrystallization from P/Et<sub>2</sub>O = 4/1 to afford 1.20 g (5.12 mmol, 37%) of 4,4-Dimethyl-1,2-epoxy-1-(4-methoxyphenyl)-pentan-3-one as a colourless solid (d.r. *trans/cis* > 95/5).

**TLC:**  $R_f = 0.37$  (P/Et<sub>2</sub>O = 2/1 + 1% NEt<sub>3</sub>) [UV, CAM].

*trans*-Diastereoisomer:

**<sup>1</sup>H-NMR** (360 MHz, CDCl<sub>3</sub>): δ [ppm] = 1.23 [s, 9 H, C(CH<sub>3</sub>)<sub>3</sub>], 3.80 (d, <sup>3</sup>J = 1.9 Hz, 1 H, H-1), 3.81 (s, 3 H, OMe), 3.85 (d, <sup>3</sup>J = 1.9 Hz, 1 H, H-2), 6.88-6.92 (m, 2 H, H-C), 7.21-7.25 (m, 2 H, H-B).

**<sup>13</sup>C-NMR** (90.6 MHz, CDCl<sub>3</sub>): δ [ppm] = 25.7 [q, C(CH<sub>3</sub>)<sub>3</sub>], 43.5 [s, C(CH<sub>3</sub>)<sub>3</sub>], 55.3 (q, OMe), 59.1 (d, C-2), 59.3 (d, C-1), 114.1 (d, C-C), 127.0 (d, C-B), 127.5 (s, C-A), 160.2 (s, C-D), 208.2 (s, C-3).

**MS** (EI, 70 eV): *m/z* (%) = 234 (35) [M<sup>+</sup>], 177 (8) [(M-C<sub>4</sub>H<sub>9</sub>)<sup>+</sup>], 161 (11) [(M-C<sub>4</sub>H<sub>9</sub>O)<sup>+</sup>], 149 (19), 149 (19) [(M-C<sub>5</sub>H<sub>9</sub>O)<sup>+</sup>], 121 (100) [(M-C<sub>6</sub>H<sub>9</sub>O<sub>2</sub>)<sup>+</sup>], 57 (70).

***tert*-Butyl 3-(4-methoxyphenyl)oxirane-2-carboxylate (*trans*-5)<sup>[6]</sup>**

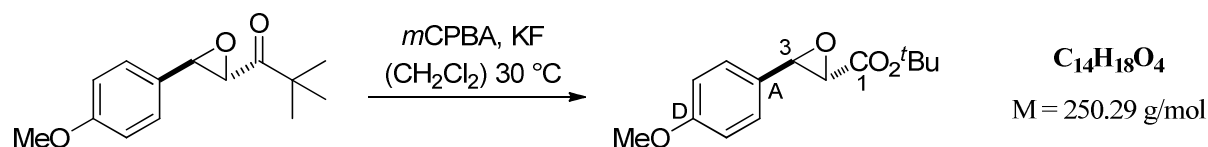

3-Chloroperoxybenzoic acid (3.28 g, 13.3 mmol, 70-75% in H<sub>2</sub>O, 2.60 eq.) and KF (2.23 g, 38.4 mmol, 7.50 eq.) were dissolved in CH<sub>2</sub>Cl<sub>2</sub> (60 mL) under an atmosphere of argon and stirred at ambient temperature for 30 min. Then 4,4-Dimethyl-1,2-epoxy-1-(4-methoxyphenyl)-pentan-3-one (1.20 g, 5.12 mmol, d.r. *trans/cis* > 95/5, 1.00 eq.), dissolved in CH<sub>2</sub>Cl<sub>2</sub> (20 mL), was added and the reaction mixture was stirred at 30 °C over night. After cooling to ambient temperature 3-Chloroperoxybenzoic acid (500 mg, 2.03 mmol, 0.40 eq.) was added and the reaction mixture was stirred for another 4 h at 30 °C. The mixture was cooled to ambient temperature and filtered over Celite<sup>®</sup>. The filtrate was concentrated *in vacuo* and the crude product was purified by recrystallization from P/Et<sub>2</sub>O = 4/1 to afford 1.07 g (4.28 mmol, 83%) of *tert*-butyl 3-(4-methoxyphenyl)oxirane-2-carboxylate (*trans*-5) as a colourless solid (d.r. *trans/cis* > 95/5).

**TLC:** *R<sub>f</sub>* = 0.52 (P/Et<sub>2</sub>O = 2/1 + 1% NEt<sub>3</sub>) [UV, CAM].

*trans*-Diastereoisomer:

**<sup>1</sup>H-NMR** (500 MHz, CDCl<sub>3</sub>): δ [ppm] = 1.51 [s, 9 H, C(CH<sub>3</sub>)<sub>3</sub>], 3.40 (d, <sup>3</sup>J = 1.7 Hz, 1 H, H-2), 3.81 (s, 3 H, OMe), 3.97 (d, <sup>3</sup>J = 1.7 Hz, 1 H, H-3), 6.88-6.90 (m, 2 H, H-C), 7.20-7.22 (m, 2 H, H-B).

**<sup>13</sup>C-NMR** (90.6 MHz, CDCl<sub>3</sub>): δ [ppm] = 28.0 [q, C(CH<sub>3</sub>)<sub>3</sub>], 55.3 (q, OMe), 57.3 (d, C-2), 57.5 (d, C-3), 82.5 [s, C(CH<sub>3</sub>)<sub>3</sub>], 114.0 (d, C-C), 127.2 (s, C-A), 127.2 (d, C-B), 160.1 (s, C-D), 167.4 (s, C-1).

**MS** (EI, 70 eV): *m/z* (%) = 250 (6) [M<sup>+</sup>], 194 (27), 150 (31), 137 (39), 121 (100) [(M-C<sub>6</sub>H<sub>9</sub>O<sub>3</sub>)<sup>+</sup>].

### 3. Diastereoselective *Friedel-Crafts* alkylations

#### General procedure 2: *Friedel-Crafts* alkylations with glycidic ester 2

A flame-dried Schlenk flask was purged with argon and charged with the glycidic ester **2** (250  $\mu\text{mol}$ , 1.00 eq.) and the aryl nucleophile (1.00 mmol, 4.00 eq.) in dry nitromethane (2 mL). The solution was cooled to 0  $^{\circ}\text{C}$  and  $\text{Sc}(\text{OTf})_3$  (6.15 mg, 12.5  $\mu\text{mol}$ , 0.05 eq.) was added. The resulting mixture was stirred at 0  $^{\circ}\text{C}$  for 45 min. The reaction was quenched with sat. aqueous  $\text{NaHCO}_3$  (5 mL) and diluted with  $\text{CH}_2\text{Cl}_2$  (5 mL). The layers were separated and the aqueous layer was extracted with  $\text{CH}_2\text{Cl}_2$  ( $2 \times 7$  mL). The combined organic layers were dried over  $\text{Na}_2\text{SO}_4$ , filtered and concentrated *in vacuo*. The crude product was purified by flash chromatography to give the respective product.

#### General procedure 3: *Friedel-Crafts* alkylations with glycidic ester 5

A flame-dried Schlenk flask was purged with argon and charged with the glycidic ester **5** (37.5 mg, 150  $\mu\text{mol}$ , 1.00 eq.) and the aryl nucleophile (600  $\mu\text{mol}$ , 4.00 Äq.) in dry nitromethane (2 mL). The solution was cooled to  $-25$   $^{\circ}\text{C}$  and  $\text{Sc}(\text{OTf})_3$  (3.69 mg, 7.50  $\mu\text{mol}$ , 0.05 eq.) was added. The resulting mixture was stirred at  $-25$   $^{\circ}\text{C}$  for 4 h. The reaction was quenched with sat. aqueous  $\text{NaHCO}_3$  (5 mL) and diluted with  $\text{CH}_2\text{Cl}_2$  (5 mL). The layers were separated and the aqueous layer was extracted with  $\text{CH}_2\text{Cl}_2$  ( $2 \times 7$  mL). The combined organic layers were dried over  $\text{Na}_2\text{SO}_4$ , filtered and concentrated *in vacuo*. The crude product was purified by flash chromatography to give the respective product.

#### Methyl 3-(2,4-dimethoxyphenyl)-2-hydroxy-3-(4-methoxyphenyl)propanoate (**6a**)

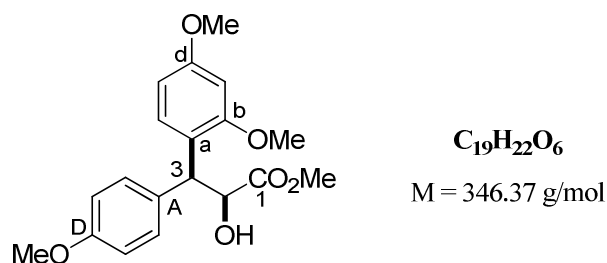

Following **general procedure 2**, reaction of **2a** (52.1 mg, 250  $\mu\text{mol}$ , 1.00 eq.) with 1,3-dimethoxybenzene (132  $\mu\text{L}$ , 1.00 mmol, 4.00 eq.) and  $\text{Sc}(\text{OTf})_3$  (6.15 mg, 12.5  $\mu\text{mol}$ , 0.05 eq.) yielded after flash chromatography (P/Et<sub>2</sub>O: 4/1  $\rightarrow$  2/1) **6a** (66 mg, 191  $\mu\text{mol}$ , 76%) as a colourless solid (d.r. *anti/syn* 17/83).

**TLC:**  $R_f = 0.21$  (P/Et<sub>2</sub>O 1/1) [UV, CAM].

**m.p.:** 130-132 °C (d.r. *anti/syn* = 17/83).

**IR** (ATR):  $\tilde{\nu} = 3556$  (br, OH), 2954 (w, C<sub>al</sub>H), 2837 (w, OMe), 2353 (m), 1732 (vs, C=O), 1610 (s), 1584 (s), 1501 (vs), 1473 (m, CH<sub>3</sub>), 1246 (vs, COC), 1181 (m), 1112 (vs), 1087 (m), 1028 (s), 841 cm<sup>-1</sup> (s, C<sub>ar</sub>H).

*syn*-Diastereoisomer:

**<sup>1</sup>H-NMR** (500 MHz, CDCl<sub>3</sub>):  $\delta$  [ppm] = 2.76 (bs, 1 H, OH), 3.67 (s, 3 H, COOMe), 3.76 + 3.77 + 3.78 (3×s, 3×3 H, H<sub>b</sub>-OMe + H<sub>d</sub>-OMe + H<sub>D</sub>-OMe), 4.82-4.85 (m, 2 H, H-2 + H-3), 6.40-6.44 (m, 2 H, H-c + H-e), 6.83 (*virt.d*,  $J \cong 8.4$  Hz, 2 H, H-C), 7.11 (d,  $^3J = 8.4$  Hz, 1 H, H-f), 7.30 (*virt.d*,  $J \cong 8.4$  Hz, 2 H, H-B).

**<sup>13</sup>C-NMR** (90.6 MHz, CDCl<sub>3</sub>):  $\delta$  [ppm] = 45.7 (d, C-3), 52.1 (q, COOMe), 55.2 + 55.2 + 55.5 (3×C, 3×q, C<sub>b</sub>-OMe + C<sub>d</sub>-OMe + C<sub>D</sub>-OMe), 73.2 (d, C-2), 98.5 (d, C-c), 104.2 (d, C-e), 113.6 (d, C-C), 119.8 (s, C-a), 129.5 (d, C-B), 131.2 (d, C-f), 134.0 (s, C-A), 157.9 + 158.0 + 159.7 (3×C, 3×s, C-b + C-d + C-D), 174.4 (s, C-1).

*anti*-Diastereoisomer:

**<sup>1</sup>H-NMR** (500 MHz, CDCl<sub>3</sub>):  $\delta$  [ppm] = 2.76 (bs, 1 H, OH), 3.69 (s, 3 H, COOMe), 3.74 + 3.77 + 3.78 (3×s, 3×3 H, H<sub>b</sub>-OMe + H<sub>d</sub>-OMe + H<sub>D</sub>-OMe), 4.74 (d,  $^3J = 3.8$  Hz, 1 H, H-3), 4.82-4.86 (m, 1 H, H-2), 6.42-6.44 (m, 1 H, H-c), 6.45-6.47 (m, 1 H, H-e), 6.80 (*virt.d*,  $J \cong 8.3$  Hz, 2 H, H-C), 7.20 (*virt.d*,  $J \cong 8.6$  Hz, 2 H, H-B), 7.44 (d,  $^3J = 8.3$  Hz, 1 H, H-f).

**<sup>13</sup>C-NMR** (90.6 MHz, CDCl<sub>3</sub>):  $\delta$  [ppm] = 46.2 (d, C-3), 52.4 (q, COOMe), 55.1 + 55.3 + 55.4 (3×C, 3×q, C<sub>b</sub>-OMe + C<sub>d</sub>-OMe + C<sub>D</sub>-OMe), 73.3 (d, C-2), 98.6 (d, C-c), 103.9 (d, C-e), 113.5 (d, C-C), 122.6 (s, C-a), 129.7 (d, C-f), 130.2 (d, C-B), 131.2 (s, C-A), 157.6 + 158.2 + 159.6 (3×C, 3×s, C-b + C-d + C-D), 174.4 (s, C-1).

**MS** (EI, 70 eV):  $m/z$  (%) = 346 (1) [M<sup>+</sup>], 328 (3) [(M-H<sub>2</sub>O)<sup>+</sup>], 257 (75) [(M-C<sub>3</sub>H<sub>5</sub>O<sub>3</sub>)<sup>+</sup>], 196 (94), 165 (84), 135 (100).

**HRMS** (EI): C<sub>19</sub>H<sub>20</sub>O<sub>5</sub> [(M-H<sub>2</sub>O)<sup>+</sup>]: calcd.: 328.1305; found: 328.1306.

|                                                               |         |          |          |
|---------------------------------------------------------------|---------|----------|----------|
| <b>CHN</b> (C <sub>19</sub> H <sub>22</sub> O <sub>6</sub> ): | calcd.: | C: 65.88 | H: 6.40  |
|                                                               | found:  | C: 65.89 | H: 6.61. |

### Methyl 2-hydroxy-3-(4-methoxyphenyl)-3-(5-methylthiophen-2-yl)propanoate (**7a**)

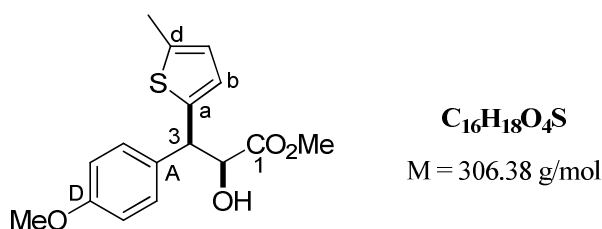

Following **general procedure 2**, reaction of **2a** (52.1 mg, 250  $\mu$ mol, 1.00 eq.) with 2-methylthiophene (96.8  $\mu$ L, 1.00 mmol, 4.00 eq.) and Sc(OTf)<sub>3</sub> (6.15 mg, 12.5  $\mu$ mol, 0.05 eq.) yielded after flash chromatography (P/Et<sub>2</sub>O: 4/1  $\rightarrow$  1/1) **7a** (64 mg, 209  $\mu$ mol, 84%) as a yellow oil (d.r. *anti/syn* 25/75).

**TLC:**  $R_f$  = 0.18 (P/Et<sub>2</sub>O: 2/1) [UV, CAM].

**IR** (ATR):  $\tilde{\nu}$  = 3484 (br, OH), 2928 (w, C<sub>al</sub>H), 2837 (w, OMe), 1735 (vs, C=O), 1610 (m), 1511 (vs), 1439 (m, CH<sub>3</sub>), 1246 (vs, COC), 1179 (s), 1113 (m), 1031 (s), 834 (m, C<sub>ar</sub>H), 802 (m), 731 cm<sup>-1</sup> (m).

*syn*-Diastereoisomer:

**<sup>1</sup>H-NMR** (360 MHz, CDCl<sub>3</sub>):  $\delta$  [ppm] = 2.41 (d, <sup>4</sup> $J$  = 1.1 Hz, 3 H, H<sub>d</sub>-Me), 3.03 (d, <sup>3</sup> $J$  = 5.8 Hz, 1 H, OH), 3.73 (s, 3 H, COOMe), 3.79 (s, 3 H, H<sub>D</sub>-OMe), 4.63 (d, <sup>3</sup> $J$  = 3.6 Hz, 1 H, H-3), 4.72 (dd, <sup>3</sup> $J$  = 3.6 Hz, <sup>3</sup> $J$  = 5.8 Hz, 1 H, H-2), 6.56-6.58 (m, 1 H, H-c), 6.69 (d, <sup>3</sup> $J$  = 3.4 Hz, 1 H, H-b), 6.84-6.88 (m, 2 H, H-C), 7.36-7.40 (m, 2 H, H-B).

**<sup>13</sup>C-NMR** (90.6 MHz, CDCl<sub>3</sub>):  $\delta$  [ppm] = 15.2 (q, C<sub>d</sub>-Me), 49.5 (d, C-3), 52.6 (q, COOMe), 55.2 (q, C<sub>D</sub>-OMe), 74.2 (d, C-2), 113.8 (d, C-C), 124.5 (d, C-c), 126.1 (d, C-b), 129.3 (d, C-B), 133.0 (s, C-A), 139.0 (s, C-a), 139.4 (s, C-d), 158.5 (s, C-D), 173.7 (s, C-1).

*anti*-Diastereoisomer:

**<sup>1</sup>H-NMR** (360 MHz, CDCl<sub>3</sub>):  $\delta$  [ppm] = 2.43 (d, <sup>4</sup> $J$  = 1.0 Hz, 3 H, H<sub>d</sub>-Me), 2.86 (d, <sup>3</sup> $J$  = 5.8 Hz, 1 H, OH), 3.72 (s, 3 H, COOMe), 3.78 (s, 3 H, H<sub>D</sub>-OMe), 4.60 (d, <sup>3</sup> $J$  = 3.4 Hz, 1 H, H-3), 4.82 (dd, <sup>3</sup> $J$  = 3.4 Hz, <sup>3</sup> $J$  = 5.8 Hz, 1 H, H-2), 6.58-6.60 (m, 1 H, H-c), 6.81-6.88 (m, 3 H, H-b + H-C), 7.22-7.25 (m, 2 H, H-B).

**<sup>13</sup>C-NMR** (90.6 MHz, CDCl<sub>3</sub>):  $\delta$  [ppm] = 15.2 (q, C<sub>d</sub>-Me), 49.4 (d, C-3), 52.5 (q, COOMe), 55.1 (q, C<sub>D</sub>-OMe), 74.2 (d, C-2), 113.7 (d, C-C), 124.5 (d, C-c), 125.4 (d, C-b), 130.0 (d, C-B), 130.4 (s, C-A), 138.8 (s, C-d), 142.0 (s, C-a), 158.9 (s, C-D), 173.4 (s, C-1).

**MS** (EI, 70 eV):  $m/z$  (%) = 306 (1) [M<sup>+</sup>], 217 (100) [(M-C<sub>3</sub>H<sub>5</sub>O<sub>3</sub>)<sup>+</sup>], 135 (34), 121 (26).

**HRMS** (EI): C<sub>16</sub>H<sub>18</sub>O<sub>4</sub>S [M<sup>+</sup>]: calcd.: 306.0920; found: 306.0917.

**Methyl 2-hydroxy-3-(5-methylthiophen-2-yl)-3-phenylpropanoate (7b)**

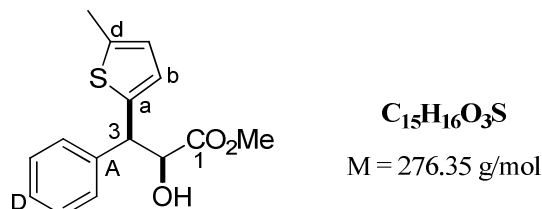

Following **general procedure 2**, reaction of **2b** (44.5 mg, 250 μmol, 1.00 eq.) with 2-methylthiophene (96.8 μL, 1.00 mmol, 4.00 eq.) and Sc(OTf)<sub>3</sub> (6.15 mg, 12.5 μmol, 0.05 eq.) yielded after flash chromatography (P/Et<sub>2</sub>O: 6/1 → 2/1) **7b** (36 mg, 130 μmol, 52%) as a yellow oil (d.r. *anti/syn* 44/56).

**TLC**: R<sub>f</sub> = 0.49 (P/Et<sub>2</sub>O: 1/1) [UV, CAM].

**IR** (ATR):  $\tilde{\nu}$  = 3493 (br, OH), 3025 (w, C<sub>ar</sub>H), 2952 (w, C<sub>al</sub>H), 2919 (w, C<sub>al</sub>H), 2861 (w), 1733 (vs, C=O), 1557 (w), 1495 (m, C=C<sub>ar</sub>), 1437 (s, CH<sub>3</sub>), 1217 (vs, COC), 1093 (vs), 796 (m), 700 cm<sup>-1</sup> (s).

*syn*-Diastereoisomer:

**<sup>1</sup>H-NMR** (360 MHz, CDCl<sub>3</sub>): δ [ppm] = 2.37 (d, <sup>4</sup>J = 0.9 Hz, 3 H, H<sub>d</sub>-Me), 3.02 (bs, 1 H, OH), 3.69 (s, 3 H, COOMe), 4.64 (d, <sup>3</sup>J = 3.4 Hz, 1 H, H-3), 4.72 (d, <sup>3</sup>J = 3.4 Hz, 1 H, H-2), 6.53-6.56 (m, 1 H, H-c), 6.67 (d, <sup>3</sup>J = 3.4 Hz, 1 H, H-b), 7.19-7.44 (m, 5 H, H-B + H-C + H-D).

**<sup>13</sup>C-NMR** (90.6 MHz, CDCl<sub>3</sub>): δ [ppm] = 15.2 (q, C<sub>d</sub>-Me), 50.2 (d, C-3), 52.7 (q, COOMe), 74.0 (d, C-2), 124.6 (d, C-c), 126.3 (d, C-b), 127.0 (d, C-D), 128.3 + 128.4 (2×C, 2×d, C-B + C-C), 138.4 (s, C-a), 139.5 (s, C-d), 140.8 (s, C-A), 173.6 (s, C-1).

*anti*-Diastereoisomer:

**<sup>1</sup>H-NMR** (360 MHz, CDCl<sub>3</sub>): δ [ppm] = 2.39 (bs, 3 H, H<sub>d</sub>-Me), 2.83 (bs, 1 H, OH), 3.67 (s, 3 H, COOMe), 4.59 (d, <sup>3</sup>J = 3.4 Hz, 1 H, H-3), 4.80 (d, <sup>3</sup>J = 3.4 Hz, 1 H, H-2), 6.53-6.56 (m, 1 H, H-c), 6.79 (d, <sup>3</sup>J = 3.4 Hz, 1 H, H-b), 7.19-7.44 (m, 5 H, H-B + H-C + H-D).

**<sup>13</sup>C-NMR** (90.6 MHz, CDCl<sub>3</sub>): δ [ppm] = 15.2 (q, C<sub>d</sub>-Me), 50.3 (d, C-3), 52.5 (q, COOMe), 74.2 (d, C-2), 124.5 (d, C-c), 125.6 (d, C-b), 127.5 (d, C-D), 128.2 + 128.9 (2×C, 2×d, C-B + C-C), 138.3 (s, C-A), 138.9 (s, C-d), 141.5 (s, C-a), 173.3 (s, C-1).

**MS** (ESI):  $m/z$  (%) = 299 [(M+Na)<sup>+</sup>], 277 [(M+H)<sup>+</sup>].

**HRMS** (ESI): C<sub>15</sub>H<sub>16</sub>O<sub>3</sub>SNa [(M+Na)<sup>+</sup>]: calcd.: 299.0712; found: 299.0712.

### Methyl 2-hydroxy-3-(5-methylthiophen-2-yl)-3-(*p*-tolyl)propanoate (**7c**)

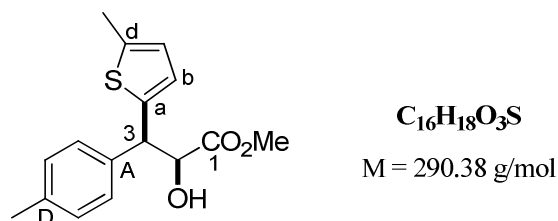

Following **general procedure 2**, reaction of **2c** (48.1 mg, 250 μmol, 1.00 eq.) with 2-methylthiophene (96.8 μL, 1.00 mmol, 4.00 eq.) and Sc(OTf)<sub>3</sub> (6.15 mg, 12.5 μmol, 0.05 eq.) yielded after flash chromatography (P/Et<sub>2</sub>O: 1/1) **7c** (58 mg, 200 μmol, 80%) as a yellow oil (d.r. *anti/syn* 35/65).

**TLC**:  $R_f$  = 0.49 (P/Et<sub>2</sub>O: 1/1) [UV, CAM].

**IR** (ATR):  $\tilde{\nu}$  = 3493 (br, OH), 3005 (w, C<sub>ar</sub>H), 2952 (m, C<sub>al</sub>H), 2912 (m, C<sub>al</sub>H), 2861 (w), 1733 (vs, C=O), 1639 (m), 1513 (s), 1437 (s, CH<sub>3</sub>), 1215 (vs, COC), 1092 (vs), 1021 (m), 798 (s), 723 cm<sup>-1</sup> (s).

*syn*-Diastereoisomer:

**<sup>1</sup>H-NMR** (360 MHz, CDCl<sub>3</sub>):  $\delta$  [ppm] = 2.33 (s, 3 H, H<sub>D</sub>-Me), 2.41 (d, <sup>4</sup> $J$  = 1.0 Hz, 3 H, H<sub>d</sub>-Me), 3.02 (d, <sup>3</sup> $J$  = 6.3 Hz, 1 H, OH), 3.74 (s, 3 H, COOMe), 4.65 (d, <sup>3</sup> $J$  = 3.5 Hz, 1 H, H-3), 4.74 (dd, <sup>3</sup> $J$  = 6.3 Hz, <sup>3</sup> $J$  = 3.5 Hz, 1 H, H-2), 6.57 (dd, <sup>3</sup> $J$  = 3.4 Hz, <sup>4</sup> $J$  = 1.0 Hz, 1 H, H-c), 6.70 (d, <sup>3</sup> $J$  = 3.4 Hz, 1 H, H-b), 7.13 (*virt.* d,  $J \cong 7.9$  Hz, 2 H, H-C), 7.35 (*virt.* d,  $J \cong 8.1$  Hz, 2 H, H-B).

**<sup>13</sup>C-NMR** (90.6 MHz, CDCl<sub>3</sub>):  $\delta$  [ppm] = 15.2 (q, C<sub>d</sub>-Me), 21.0 (q, C<sub>D</sub>-Me), 49.9 (d, C-3), 52.6 (q, COOMe), 74.2 (d, C-2), 124.6 (d, C-c), 126.2 (d, C-b), 128.1 (d, C-B), 129.1 (d, C-C), 136.7 (s, C-D), 137.9 (s, C-A), 138.7 (s, C-a), 139.4 (s, C-d), 173.7 (s, C-1).

*anti*-Diastereoisomer:

**<sup>1</sup>H-NMR** (360 MHz, CDCl<sub>3</sub>):  $\delta$  [ppm] = 2.31 (s, 3 H, H<sub>D</sub>-Me), 2.43 (bs, 3 H, H<sub>d</sub>-Me), 2.83 (d, <sup>3</sup> $J$  = 6.7 Hz, 1 H, OH), 3.72 (s, 3 H, COOMe), 4.60 (d, <sup>3</sup> $J$  = 3.5 Hz, 1 H, H-3), 4.83 (dd, <sup>3</sup> $J$  = 6.7 Hz, <sup>3</sup> $J$  = 3.5 Hz, 1 H, H-2), 6.59 (dd, <sup>3</sup> $J$  = 3.4 Hz, <sup>4</sup> $J$  = 1.1 Hz, 1 H, H-c), 6.83



(d,  $^3J = 3.4$  Hz, 1 H, H-b), 7.10 (*virt. d*,  $J \cong 8.1$  Hz, 2 H, H-C), 7.19 (*virt. d*,  $J \cong 8.1$  Hz, 2 H, H-B).

$^{13}\text{C-NMR}$  (90.6 MHz,  $\text{CDCl}_3$ ):  $\delta$  [ppm] = 15.2 (q,  $\text{C}_d\text{-Me}$ ), 21.1 (q,  $\text{C}_b\text{-Me}$ ), 50.0 (d, C-3), 52.5 (q,  $\text{COOMe}$ ), 74.2 (d, C-2), 124.5 (d, C-c), 125.5 (d, C-b), 128.8 (d, C-B), 129.1 (d, C-C), 135.3 (s, C-A), 137.1 (s, C-D), 138.9 (s, C-d), 141.8 (s, C-a), 173.4 (s, C-1).

**MS** (ESI):  $m/z$  (%) = 313 [(M+Na) $^+$ ], 291 [(M+H) $^+$ ].

**HRMS** (ESI):  $\text{C}_{16}\text{H}_{19}\text{O}_3\text{S}$  [(M+H) $^+$ ]: *calcd.*: 291.1049; *found*: 291.1050.

### Methyl 3-(2,4-dimethylphenyl)-2-hydroxy-3-phenylpropanoate (**8b**)

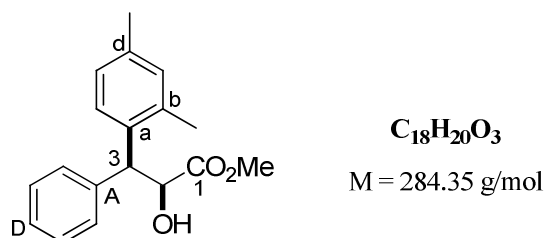

Following **general procedure 2**, reaction of **2b** (44.5 mg, 250  $\mu\text{mol}$ , 1.00 eq.) with *m*-xylene (123  $\mu\text{L}$ , 1.00 mmol, 4.00 eq.) and  $\text{Sc}(\text{OTf})_3$  (6.15 mg, 12.5  $\mu\text{mol}$ , 0.05 eq.) yielded after flash chromatography (P/Et $_2$ O: 4/1  $\rightarrow$  1/1) **8b** (26 mg, 91.4  $\mu\text{mol}$ , 37%) as a colourless oil (*d.r. anti/syn* 29/71).

**TLC**:  $R_f = 0.41 + 0.50$  (P/Et $_2$ O 1/1) [UV, CAM].

**IR** (ATR):  $\tilde{\nu} = 3469$  (br, OH), 3025 (w,  $\text{C}_{\text{ar}}\text{H}$ ), 2948 (w,  $\text{C}_{\text{al}}\text{H}$ ), 2912 (w,  $\text{C}_{\text{al}}\text{H}$ ), 1733 (vs, C=O), 1557 (m), 1494 (s, C=C $_{\text{ar}}$ ), 1451 (s), 1438 (s, CH $_3$ ), 1228 (vs, COC), 1122 (m), 1091 (vs), 802 (m,  $\text{C}_{\text{ar}}\text{H}$ ), 699  $\text{cm}^{-1}$  (vs).

*syn*-Diastereoisomer:

$^1\text{H-NMR}$  (500 MHz,  $\text{CDCl}_3$ ):  $\delta$  [ppm] = 2.20 (s, 3 H, H $_b$ -Me), 2.28 (s, 3 H, H $_d$ -Me), 2.74 (d,  $^3J = 5.1$  Hz, 1 H, OH), 3.58 (s, 3 H,  $\text{COOMe}$ ), 4.59 (d,  $^3J = 5.9$  Hz, 1 H, H-3), 4.88-4.91 (m, 1 H, H-2), 6.96 (bs, 1 H, H-c), 7.02 (d,  $^3J = 7.8$  Hz, 1 H, H-e), 7.18-7.27 (m, 5 H, H-B + H-C + H-D), 7.47 (d,  $^3J = 7.8$  Hz, 1 H, H-f).

$^{13}\text{C-NMR}$  (90.6 MHz,  $\text{CDCl}_3$ ):  $\delta$  [ppm] = 19.7 (q,  $\text{C}_b\text{-Me}$ ), 20.9 (q,  $\text{C}_d\text{-Me}$ ), 50.1 (d, C-3), 52.2 (q,  $\text{COOMe}$ ), 74.0 (d, C-2), 126.6 + 126.7 (2 $\times$ C, 2 $\times$ d, C-D + C-e), 128.0 (d, C-f), 128.4 + 128.6 (2 $\times$ C, 2 $\times$ d, C-B + C-C), 131.6 (d, C-c), 134.5 (s, C-a), 136.4 (s, C-d), 136.5 (s, C-b), 140.5 (s, C-A), 174.2 (s, C-1).

*anti*-Diastereoisomer:

**<sup>1</sup>H-NMR** (500 MHz, CDCl<sub>3</sub>): δ [ppm] = 2.12 (s, 3 H, H<sub>b</sub>-Me), 2.30 (s, 3 H, H<sub>d</sub>-Me), 2.66 (d, <sup>3</sup>J = 7.2 Hz, 1 H, OH), 3.77 (s, 3 H, COOMe), 4.59-4.60 (m, 1 H, H-3), 4.88-4.91 (m, 1 H, H-2), 6.94 (bs, 1 H, H-c), 7.07 (d, <sup>3</sup>J = 8.2 Hz, 1 H, H-e), 7.12-7.14 (m, 2 H, H<sub>Ar</sub>), 7.23-7.27 (m, 3 H, H<sub>Ar</sub>), 7.72 (d, <sup>3</sup>J = 8.2 Hz, 1 H, H-f).

**<sup>13</sup>C-NMR** (90.6 MHz, CDCl<sub>3</sub>): δ [ppm] = 19.9 (q, C<sub>b</sub>-Me), 20.9 (q, C<sub>d</sub>-Me), 50.4 (d, C-3), 52.5 (q, COOMe), 73.6 (d, C-2), 126.7 + 126.9 (2×C, 2×d, C-D + C-e), 127.8 (d, C-f), 128.3 + 129.4 (2×C, 2×d, C-B + C-C), 131.3 (d, C-c), 136.0 (s, C-b), 136.3 (s, C-d), 136.9 (s, C-a), 138.1 (s, C-A), 174.2 (s, C-1).

**MS** (ESI): *m/z* (%) = 307 [(M+Na)<sup>+</sup>], 285 [(M+H)<sup>+</sup>].

**HRMS** (ESI): C<sub>18</sub>H<sub>21</sub>O<sub>3</sub> [(M+H)<sup>+</sup>]: calcd.: 285.1485; found: 285.1485.

### Methyl 3-(2,4-dimethylphenyl)-2-hydroxy-3-(*p*-tolyl)propanoate (**8c**)

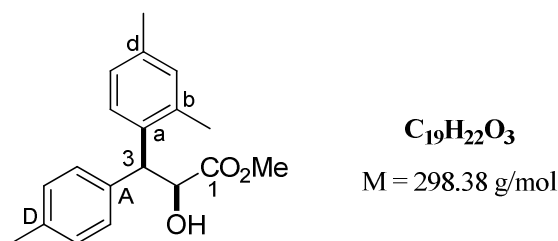

Following **general procedure 2**, reaction of **2c** (48.1 mg, 250 μmol, 1.00 eq.) with *m*-xylene (123 μL, 1.00 mmol, 4.00 eq.) and Sc(OTf)<sub>3</sub> (6.15 mg, 12.5 μmol, 0.05 eq.) yielded after flash chromatography (P/Et<sub>2</sub>O: 4/1 → 1/1) **8c** (24 mg, 80.4 μmol, 32%) as a colourless oil (d.r. *anti/syn* 9/91).

**TLC**: *R<sub>f</sub>* = 0.61 (*anti*)/0.56 (*syn*) (P/Et<sub>2</sub>O: 1/1) [UV, CAM].

**IR** (ATR):  $\tilde{\nu}$  = 3484 (br, OH), 3006 (w, C<sub>ar</sub>H), 2952 (m, C<sub>al</sub>H), 2919 (m, C<sub>al</sub>H), 2861 (w), 1732 (vs, C=O), 1512 (s), 1503 (s), 1437 (s, CH<sub>3</sub>), 1253 (vs, COC), 1126 (s), 1090 (vs), 805 (s, C<sub>ar</sub>H), 737 cm<sup>-1</sup> (m).

*syn*-Diastereoisomer:

**<sup>1</sup>H-NMR** (360 MHz, CDCl<sub>3</sub>): δ [ppm] = 2.20 (s, 3 H, H<sub>b</sub>-Me), 2.28 (s, 3 H, H<sub>d</sub>-Me), 2.30 (s, 3 H, H<sub>D</sub>-Me), 2.71 (bs, 1 H, OH), 3.59 (s, 3 H, COOMe), 4.56 (d, <sup>3</sup>J = 5.8 Hz, 1 H, H-3), 4.88 (d, <sup>3</sup>J = 5.8 Hz, 1 H, H-2), 6.94-6.97 (m, 1 H, H-c), 7.00-7.03 (m, 1 H, H-e), 7.07-7.09 (m, 2 H, H-C), 7.13-7.15 (m, 2 H, H-B), 7.47 (d, <sup>3</sup>J = 7.9 Hz, 1 H, H-f).

$^{13}\text{C-NMR}$  (90.6 MHz,  $\text{CDCl}_3$ ):  $\delta$  [ppm] = 19.7 (q,  $\text{C}_b\text{-Me}$ ), 20.9 + 21.0 ( $2\times\text{C}$ ,  $2\times\text{q}$ ,  $\text{C}_d\text{-Me}$  +  $\text{C}_D\text{-Me}$ ), 49.6 (d, C-3), 52.3 (q,  $\text{COOMe}$ ), 74.1 (d, C-2), 126.7 (d, C-e), 127.9 (d, C-f), 128.4 (d, C-B), 129.1 (d, C-C), 131.5 (d, C-c), 134.6 (s, C-a), 136.2 (s, C-D), 136.3 (s, C-d), 136.5 (s, C-b), 137.3 (s, C-A), 174.2 (s, C-1).

**MS** (ESI):  $m/z$  (%) = 321 [(M+Na) $^+$ ], 299 [(M+H) $^+$ ].

**HRMS** (ESI):  $\text{C}_{19}\text{H}_{23}\text{O}_3$  [(M+H) $^+$ ]: calcd.: 299.1642; found: 299.1642.

### ***tert*-Butyl 3-(2,4-dimethoxyphenyl)-2-hydroxy-3-(4-methoxyphenyl)propanoate (11a)**

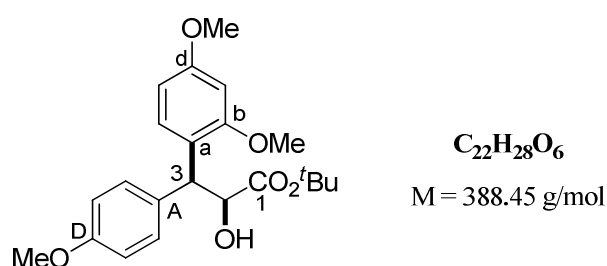

Following **general procedure 3**, reaction of **5** (37.5 mg, 150  $\mu\text{mol}$ , 1.00 eq.) with 1,3-dimethoxybenzene (79.0  $\mu\text{L}$ , 600  $\mu\text{mol}$ , 4.00 eq.) and  $\text{Sc}(\text{OTf})_3$  (3.69 mg, 7.50  $\mu\text{mol}$ , 0.05 eq.) yielded after flash chromatography (P/Et<sub>2</sub>O: 4/1  $\rightarrow$  1/1) **11a** (45 mg, 116  $\mu\text{mol}$ , 77%) as a colourless solid (d.r. *anti/syn* 7/93).

**TLC**:  $R_f$  = 0.21 (P/Et<sub>2</sub>O 2/1) [UV, CAM].

**m.p.**: 115  $^\circ\text{C}$  (d.r. *anti/syn* = 7/93).

**IR** (ATR):  $\tilde{\nu}$  = 3490 (br, OH), 2984 (w,  $\text{C}_{\text{al}}\text{H}$ ), 2939 (w), 2911 (w), 2837 (m, OMe), 1717 (vs, C=O), 1608 (s), 1507 (vs), 1469 (m,  $\text{CH}_3$ ), 1260 (s, COC), 1207 (s), 1157 (vs), 1124 (s), 1034 (s), 834 (m,  $\text{C}_{\text{ar}}\text{H}$ ), 737  $\text{cm}^{-1}$  (m).

*syn*-Diastereoisomer:

$^1\text{H-NMR}$  (500 MHz,  $\text{CDCl}_3$ ):  $\delta$  [ppm] = 1.25 [s, 9 H,  $\text{C}(\text{CH}_3)_3$ ], 3.01 (bs, 1 H, OH), 3.76 + 3.76 ( $2\times\text{s}$ ,  $2\times 3$  H,  $\text{H}_b\text{-OMe}$  +  $\text{H}_D\text{-OMe}$ ), 3.77 (s, 3 H,  $\text{H}_d\text{-OMe}$ ), 4.70 (d,  $^3J$  = 5.8 Hz, 1 H, H-2), 4.77 (d,  $^3J$  = 5.8 Hz, 1 H, H-3), 6.43 (d,  $^4J$  = 2.5 Hz, 1 H, H-c), 6.46 (dd,  $^3J$  = 8.5 Hz,  $^4J$  = 2.5 Hz, 1 H, H-e), 6.80-6.82 (m, 2 H, H-C), 7.25-7.27 (m, 2 H, H-B), 7.42 (d,  $^3J$  = 8.5 Hz, 1 H, H-f).

$^{13}\text{C-NMR}$  (90.6 MHz,  $\text{CDCl}_3$ ):  $\delta$  [ppm] = 27.7 [q,  $\text{C}(\text{CH}_3)_3$ ], 45.4 (d, C-3), 55.2 + 55.3 + 55.4 ( $3\times\text{C}$ ,  $3\times\text{q}$ ,  $\text{C}_b\text{-OMe}$  +  $\text{C}_d\text{-OMe}$  +  $\text{C}_D\text{-OMe}$ ), 74.0 (d, C-2), 82.0 [s,  $\text{C}(\text{CH}_3)_3$ ], 98.6 (d, C-c),

104.1 (d, C-e), 113.6 (d, C-C), 121.2 (s, C-a), 129.7 (d, C-B), 130.2 (d, C-f), 133.6 (s, C-A), 158.0 + 158.0 (2×C, 2×s, C-b + C-D), 159.5 (s, C-d), 173.2 (s, C-1).

**MS** (ESI):  $m/z$  (%) = 799 (100) [(2M+Na)<sup>+</sup>], 735 (38), 411 (34) [(M+Na)<sup>+</sup>], 333 (20), 225 (9).

**HRMS** (ESI): C<sub>22</sub>H<sub>28</sub>O<sub>6</sub>Na [(M+Na)<sup>+</sup>]: calcd.: 411.1778; found: 411.1776.

### ***tert*-Butyl 2-hydroxy-3-(4-methoxyphenyl)-3-(2,3,4-trimethoxyphenyl)propanoate (11b)**

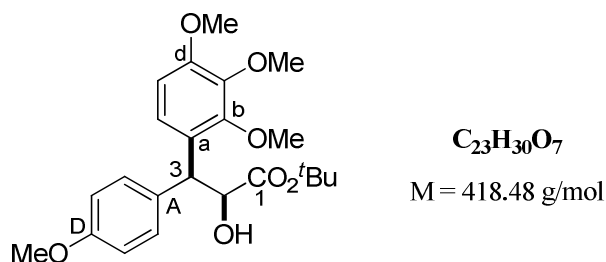

Following **general procedure 3**, reaction of **5** (37.5 mg, 150 μmol, 1.00 eq.) with 1,2,3-trimethoxybenzene (101 mg, 600 μmol, 4.00 Eq.) and Sc(OTf)<sub>3</sub> (3.69 mg, 7.50 μmol, 0.05 eq.) yielded after flash chromatography (P/Et<sub>2</sub>O: 4/1 → 1/1) **11b** (35 mg, 83.6 μmol, 56%) as a colourless oil (d.r. *anti/syn* < 5/95).

**TLC**:  $R_f$  = 0.34 (P/Et<sub>2</sub>O 1/1) [UV, CAM].

**IR** (ATR):  $\tilde{\nu}$  = 3479 (br, OH), 2977 (w, C<sub>al</sub>H), 2933 (w), 2837 (m, OMe), 1722 (vs, C=O), 1605 (s), 1510 (m), 1493 (m, C=C<sub>ar</sub>), 1462 (s, CH<sub>3</sub>), 1244 (vs, COC), 1156 (s), 1092 (vs), 838 (s, C<sub>ar</sub>H), 803 cm<sup>-1</sup> (s).

*syn*-Diastereoisomer:

**<sup>1</sup>H-NMR** (500 MHz, CDCl<sub>3</sub>):  $\delta$  [ppm] = 1.27 [s, 9 H, C(CH<sub>3</sub>)<sub>3</sub>], 3.07 (d, <sup>3</sup> $J$  = 5.8 Hz, 1 H, OH), 3.68 (s, 3 H, H<sub>b</sub>-OMe), 3.77 (s, 3 H, H<sub>D</sub>-OMe), 3.82 (s, 3 H, H<sub>c</sub>-OMe), 3.83 (s, 3 H, H<sub>d</sub>-OMe), 4.67 (*virt. t.*, <sup>3</sup> $J$   $\cong$  5.6 Hz, 1 H, H-2), 4.71 (d, <sup>3</sup> $J$  = 5.7 Hz, 1 H, H-3), 6.64 (d, <sup>3</sup> $J$  = 8.8 Hz, 1 H, H-e), 6.82-6.84 (m, 2 H, H-C), 7.24 (d, <sup>3</sup> $J$  = 8.8 Hz, 1 H, H-f), 7.26-7.27 (m, 2 H, H-B).

**<sup>13</sup>C-NMR** (90.6 MHz, CDCl<sub>3</sub>):  $\delta$  [ppm] = 27.7 [q, C(CH<sub>3</sub>)<sub>3</sub>], 46.3 (d, C-3), 55.2 (q, C<sub>D</sub>-OMe), 55.9 (q, C<sub>a</sub>-OMe), 60.6 (q, C<sub>c</sub>-OMe), 60.8 (q, C<sub>b</sub>-OMe), 74.1 (d, C-2), 82.3 [s, C(CH<sub>3</sub>)<sub>3</sub>], 107.1 (d, C-e), 113.6 (d, C-C), 123.8 (d, C-f), 126.5 (s, C-a), 129.7 (d, C-B), 133.6 (s, C-A), 142.2 (s, C-c), 151.9 (s, C-b), 152.5 (s, C-d), 158.2 (s, C-D), 173.1 (s, C-1).

**MS** (ESI):  $m/z$  (%) = 859 (100) [(2M+Na)<sup>+</sup>], 441 (33) [(M+Na)<sup>+</sup>], 363 (6).

**HRMS** (ESI):  $C_{23}H_{30}O_7Na$   $[(M+Na)^+]$ : calcd.: 441.1884; found: 441.1885.

***tert*-Butyl 3-(5-bromo-2,4-dimethoxyphenyl)-2-hydroxy-3-(4-methoxyphenyl)propanoate (11c)**

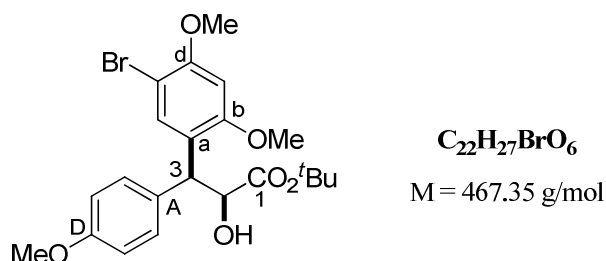

Following **general procedure 3**, reaction of **5** (37.5 mg, 150  $\mu$ mol, 1.00 eq.) with 1-bromo-2,4-dimethoxybenzene (86.2  $\mu$ L, 600  $\mu$ mol, 4.00 eq.) and  $Sc(OTf)_3$  (3.69 mg, 7.50  $\mu$ mol, 0.05 eq.) yielded after flash chromatography (P/Et<sub>2</sub>O: 2/1  $\rightarrow$  1/1) **11c** (46 mg, 98.4  $\mu$ mol, 66%) as a colourless oil (d.r. *anti/syn* = 8/92).

**TLC**:  $R_f$  = 0.19 (P/Et<sub>2</sub>O 1/1) [UV, CAM].

**IR** (ATR):  $\tilde{\nu}$  = 3484 (br, OH), 2977 (w, C<sub>al</sub>H), 2933 (w), 2837 (w, OMe), 1720 (vs, C=O), 1600 (s), 1510 (s), 1461 (m, CH<sub>3</sub>), 1368 (m), 1245 (s, COC), 1204 (s), 1150 (vs), 1027 (vs), 961 (m), 910 (m), 842 (s, C<sub>ar</sub>H), 731 cm<sup>-1</sup> (s).

*syn*-Diastereoisomer:

**<sup>1</sup>H-NMR** (500 MHz, CDCl<sub>3</sub>):  $\delta$  [ppm] = 1.27 [s, 9 H, C(CH<sub>3</sub>)<sub>3</sub>], 2.98 (d, <sup>3</sup>*J* = 6.2 Hz, 1 H, OH), 3.77 (s, 3 H, H<sub>D</sub>-OMe), 3.79 (s, 3 H, H<sub>B</sub>-OMe), 3.87 (s, 3 H, H<sub>D</sub>-OMe), 4.67 (*virt.* t, <sup>3</sup>*J*  $\cong$  5.9 Hz, 1 H, H-2), 4.72 (d, <sup>3</sup>*J* = 5.8 Hz, 1 H, H-3), 6.44 (s, 1 H, H-c), 6.81-6.83 (m, 2 H, H-C), 7.24-7.25 (m, 2 H, H-B), 7.65 (s, 1 H, H-f).

**<sup>13</sup>C-NMR** (90.6 MHz, CDCl<sub>3</sub>):  $\delta$  [ppm] = 27.7 [q, C(CH<sub>3</sub>)<sub>3</sub>], 45.6 (d, C-3), 55.2 (q, C<sub>D</sub>-OMe), 55.9 (q, C<sub>B</sub>-OMe), 56.3 (q, C<sub>D</sub>-OMe), 73.7 (d, C-2), 82.3 [s, C(CH<sub>3</sub>)<sub>3</sub>], 96.6 (d, C-c), 102.1 (s, C-e), 113.7 (d, C-C), 122.7 (s, C-a), 129.7 (d, C-B), 133.0 (s, C-A), 133.6 (d, C-f), 155.3 (s, C-d), 157.4 (s, C-b), 158.3 (s, C-D), 173.0 (s, C-1).

**MS** (ESI):  $m/z$  (%) = 957 (100)  $\{[M(^{81}Br) + M(^{79}Br) + Na]^+\}$ , 491 (26)  $\{[M(^{81}Br) + Na]^+\}$ , 489 (24)  $\{[M(^{79}Br) + Na]^+\}$ .

**HRMS** (ESI):  $C_{22}H_{27}^{81}BrO_6Na$   $\{[M(^{81}Br) + Na]^+\}$ : calcd.: 491.0863; found: 491.0865.

***tert*-Butyl 2-hydroxy-3-(4-methoxyphenyl)-3-(5-methylthiophen-2-yl)propanoate (11d)**

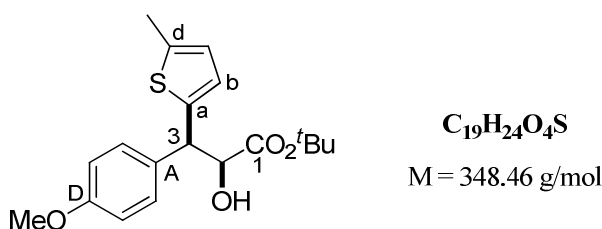

Following **general procedure 3**, reaction of **5** (37.5 mg, 150  $\mu$ mol, 1.00 eq.) with 2-methylthiophene (58.3  $\mu$ L, 600  $\mu$ mol, 4.00 eq.) and Sc(OTf)<sub>3</sub> (3.69 mg, 7.50  $\mu$ mol, 0.05 eq.) yielded after flash chromatography (P/Et<sub>2</sub>O: 6/1  $\rightarrow$  1/1) **11d** (37 mg, 106  $\mu$ mol, 71%) as a pale yellow oil (d.r. *anti/syn* = 16/84).

**TLC:**  $R_f$  = 0.57 (P/Et<sub>2</sub>O 1/1) [UV, CAM].

**IR** (ATR):  $\tilde{\nu}$  = 3483 (br, OH), 2977 (w, C<sub>al</sub>H), 2924 (w), 2837 (w, OMe), 1716 (vs, C=O), 1610 (s), 1511 (vs), 1456 (m, CH<sub>3</sub>), 1369 (m), 1247 (vs, COC), 1151 (vs), 1032 (s), 835 (s, C<sub>ar</sub>H), 803 (s), 669 cm<sup>-1</sup> (m).

*syn*-Diastereoisomer:

**<sup>1</sup>H-NMR** (500 MHz, CDCl<sub>3</sub>):  $\delta$  [ppm] = 1.37 [s, 9 H, C(CH<sub>3</sub>)<sub>3</sub>], 2.41 (s, 3 H, H<sub>d</sub>-Me), 3.04 (bs, 1 H, OH), 3.78 (s, 3 H, OMe), 4.55 (d, <sup>3</sup> $J$  = 3.8 Hz, 1 H, H-3), 4.57 (d, <sup>3</sup> $J$  = 3.8 Hz, 1 H, H-2), 6.55-6.56 (m, 1 H, H-c), 6.73 (d, <sup>3</sup> $J$  = 3.4 Hz, 1 H, H-b), 6.84-6.86 (m, 2 H, H-C), 7.35-7.37 (m, 2 H, H-B).

**<sup>13</sup>C-NMR** (90.6 MHz, CDCl<sub>3</sub>):  $\delta$  [ppm] = 15.2 (q, C<sub>d</sub>-Me), 27.8 [q, C(CH<sub>3</sub>)<sub>3</sub>], 49.6 (d, C-3), 55.2 (q, OMe), 74.2 (d, C-2), 82.9 [s, C(CH<sub>3</sub>)<sub>3</sub>], 113.7 (d, C-C), 124.3 (d, C-c), 126.1 (d, C-b), 129.4 (d, C-B), 133.4 (s, C-A), 139.1 (s, C-d), 139.4 (s, C-a), 158.5 (s, C-D), 172.4 (s, C-1).

*anti*-Diastereoisomer:

**<sup>1</sup>H-NMR** (500 MHz, CDCl<sub>3</sub>):  $\delta$  [ppm] = 1.38 [s, 9 H, C(CH<sub>3</sub>)<sub>3</sub>], 2.42 (s, 3 H, H<sub>d</sub>-Me), 3.04 (bs, 1 H, OH), 3.77 (s, 3 H, OMe), 4.52 (d, <sup>3</sup> $J$  = 3.4 Hz, 1 H, H-3), 4.68 (d, <sup>3</sup> $J$  = 3.4 Hz, 1 H, H-2), 6.56-6.57 (m, 1 H, H-c), 6.77 (d, <sup>3</sup> $J$  = 3.4 Hz, 1 H, H-b), 6.81-6.83 (m, 2 H, H-C), 7.29-7.30 (m, 2 H, H-B).

**<sup>13</sup>C-NMR** (90.6 MHz, CDCl<sub>3</sub>):  $\delta$  [ppm] = 15.2 (q, C<sub>d</sub>-Me), 27.9 [q, C(CH<sub>3</sub>)<sub>3</sub>], 49.4 (d, C-3), 55.2 (q, OMe), 74.1 (d, C-2), 83.0 [s, C(CH<sub>3</sub>)<sub>3</sub>], 113.6 (d, C-C), 124.4 (d, C-c), 125.2 (d, C-b), 130.3 (d, C-B), 130.9 (s, C-A), 138.7 (s, C-d), 142.8 (s, C-a), 158.9 (s, C-D), 172.1 (s, C-1).

**MS** (ESI):  $m/z$  (%) = 719 (100) [(2M+Na)<sup>+</sup>], 371 (52) [(M+Na)<sup>+</sup>], 315 (13).

**HRMS** (ESI):  $C_{19}H_{24}O_4SNa$  [(M+Na)<sup>+</sup>]: calcd.: 371.1288; found: 371.1288.

***tert*-Butyl 2-hydroxy-3-(4-methoxyphenyl)-3-(5-methylfuran-2-yl)propanoate (11e)**

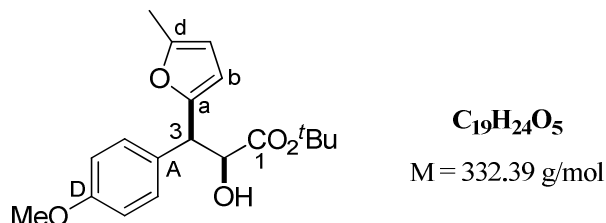

Following **general procedure 3**, reaction of **5** (37.5 mg, 150  $\mu$ mol, 1.00 eq.) with 2-methylfuran (54.1  $\mu$ L, 600  $\mu$ mol, 4.00 eq.) and  $Sc(OTf)_3$  (3.69 mg, 7.50  $\mu$ mol, 0.05 eq.) yielded after flash chromatography (P/Et<sub>2</sub>O: 4/1  $\rightarrow$  2/1) **11e** (29 mg, 87.2  $\mu$ mol, 58%) as a colourless oil (d.r. *anti/syn* = 18/82).

**TLC**:  $R_f$  = 0.30 (P/Et<sub>2</sub>O 2/1) [UV, CAM].

**IR** (ATR):  $\tilde{\nu}$  = 3484 (br, OH), 2977 (w, C<sub>al</sub>H), 2933 (w), 2837 (w, OMe), 1724 (vs, C=O), 1610 (m), 1511 (vs), 1457 (m, CH<sub>3</sub>), 1368 (s), 1246 (vs, COC), 1154 (vs), 1024 (s), 962 (m), 837 (s, C<sub>ar</sub>H), 782 cm<sup>-1</sup> (s).

*syn*-Diastereoisomer:

**<sup>1</sup>H-NMR** (500 MHz, CDCl<sub>3</sub>):  $\delta$  [ppm] = 1.41 [s, 9 H, C(CH<sub>3</sub>)<sub>3</sub>], 2.23 (s, 3 H, H<sub>d</sub>-Me), 3.02 (d, <sup>3</sup> $J$  = 5.7 Hz, 1 H, OH), 3.79 (s, 3 H, OMe), 4.39 (d, <sup>3</sup> $J$  = 4.0 Hz, 1 H, H-3), 4.47 (*virt. t*, <sup>3</sup> $J$   $\cong$  4.2 Hz, 1 H, H-2), 5.86 (d, <sup>3</sup> $J$  = 2.8 Hz, 1 H, H-c), 6.00 (d, <sup>3</sup> $J$  = 2.8 Hz, 1 H, H-b), 6.86-6.87 (m, 2 H, H-C), 7.33-7.35 (m, 2 H, H-B).

**<sup>13</sup>C-NMR** (90.6 MHz, CDCl<sub>3</sub>):  $\delta$  [ppm] = 13.5 (q, C<sub>d</sub>-Me), 27.8 [q, C(CH<sub>3</sub>)<sub>3</sub>], 48.3 (d, C-3), 55.2 (q, OMe), 73.7 (d, C-2), 82.6 [s, C(CH<sub>3</sub>)<sub>3</sub>], 106.1 (d, C-c), 108.8 (d, C-b), 113.7 (d, C-C), 129.8 (d, C-B), 131.2 (s, C-A), 151.0 (s, C-d), 151.6 (s, C-a), 158.7 (s, C-D), 172.5 (s, C-1).

*anti*-Diastereoisomer:

**<sup>1</sup>H-NMR** (500 MHz, CDCl<sub>3</sub>):  $\delta$  [ppm] = 1.39 [s, 9 H, C(CH<sub>3</sub>)<sub>3</sub>], 2.26 (s, 3 H, H<sub>d</sub>-Me), 2.89 (d, <sup>3</sup> $J$  = 5.7 Hz, 1 H, OH), 3.78 (s, 3 H, OMe), 4.34 (d, <sup>3</sup> $J$  = 3.8 Hz, 1 H, H-3), 4.73 (*virt. t*, <sup>3</sup> $J$   $\cong$  4.0 Hz, 1 H, H-2), 5.88 (d, <sup>3</sup> $J$  = 2.9 Hz, 1 H, H-c), 6.05 (d, <sup>3</sup> $J$  = 2.9 Hz, 1 H, H-b), 6.83-6.84 (m, 2 H, H-C), 7.27-7.29 (m, 2 H, H-B).

$^{13}\text{C-NMR}$  (90.6 MHz,  $\text{CDCl}_3$ ):  $\delta$  [ppm] = 13.6 (q,  $\text{C}_d\text{-Me}$ ), 27.9 [q,  $\text{C}(\text{CH}_3)_3$ ], 48.1 (d, C-3), 55.2 (q, OMe), 72.6 (d, C-2), 82.8 [s,  $\text{C}(\text{CH}_3)_3$ ], 106.1 (d, C-c), 108.2 (d, C-b), 113.6 (d, C-C), 128.9 (s, C-A), 130.5 (d, C-B), 151.0 (s, C-d), 152.9 (s, C-a), 158.9 (s, C-D), 172.3 (s, C-1).

**MS** (ESI):  $m/z$  (%) = 687 (100) [(2M+Na) $^+$ ], 355 (42) [(M+Na) $^+$ ], 299 (8).

**HRMS** (ESI):  $\text{C}_{19}\text{H}_{24}\text{O}_5\text{Na}$  [(M+Na) $^+$ ]: calcd.: 355.1516; found: 355.1517.

### *tert*-Butyl 2-hydroxy-3-(4-methoxyphenyl)-3-(1-tosyl-1*H*-pyrrol-2-yl)propanoate (**11f**)

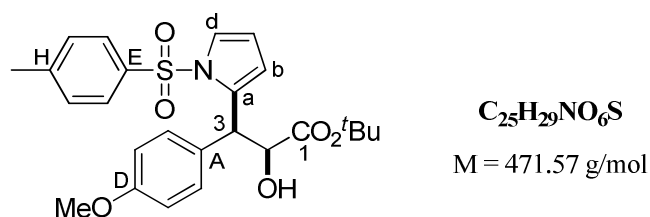

Following **general procedure 3**, reaction of **5** (37.5 mg, 150  $\mu\text{mol}$ , 1.00 eq.) with *N*-tosylpyrrole (133 mg, 600  $\mu\text{mol}$ , 4.00 eq.) and  $\text{Sc}(\text{OTf})_3$  (3.69 mg, 7.50  $\mu\text{mol}$ , 0.05 eq.) at 0  $^\circ\text{C}$  yielded after flash chromatography (P/Et<sub>2</sub>O: 4/1  $\rightarrow$  1/1) **11f** (26 mg, 55.1  $\mu\text{mol}$ , 37%) as a colourless solid (d.r. *anti/syn* = 7/93).

**TLC**:  $R_f$  = 0.30 (P/Et<sub>2</sub>O 1/1) [UV, CAM].

**m.p.**: 122  $^\circ\text{C}$  (d.r. *anti/syn* = 7/93).

**IR** (ATR):  $\tilde{\nu}$  = 3489 (br, OH), 2981 (w,  $\text{C}_{\text{al}}\text{H}$ ), 2928 (w), 2832 (w, OMe), 1712 (vs, C=O), 1610 (m), 1511 (s), 1460 (m,  $\text{CH}_3$ ), 1352 (s), 1249 (vs, COC), 1138 (vs), 1035 (m), 835 (m,  $\text{C}_{\text{ar}}\text{H}$ ), 810 (s), 734 (s), 667  $\text{cm}^{-1}$  (vs).

*syn*-Diastereoisomer:

$^1\text{H-NMR}$  (360 MHz,  $\text{CDCl}_3$ ):  $\delta$  [ppm] = 1.33 [s, 9 H,  $\text{C}(\text{CH}_3)_3$ ], 2.26 (s, 3 H,  $\text{H}_{\text{H-Me}}$ ), 3.02 (bs, 1 H, OH), 3.75 (s, 3 H, OMe), 4.44 (d,  $^3J = 4.8$  Hz, 1 H, H-2), 5.26 (d,  $^3J = 4.8$  Hz, 1 H, H-3), 6.26 (*virt. t.*,  $^3J \cong 3.4$  Hz, 1 H, H-c), 6.62-6.64 (m, 3 H, H-b + H-C), 6.88-6.90 (m, 2 H, H-G), 6.92-6.95 (m, 2 H, H-B), 7.15-7.18 (m, 2 H, H-F), 7.31 (dd,  $^3J = 3.4$  Hz,  $^4J = 1.7$  Hz, 1 H, H-d).

$^{13}\text{C-NMR}$  (90.6 MHz,  $\text{CDCl}_3$ ):  $\delta$  [ppm] = 21.4 (q,  $\text{C}_{\text{H-Me}}$ ), 27.7 [q,  $\text{C}(\text{CH}_3)_3$ ], 44.3 (d, C-3), 55.2 (q, OMe), 75.1 (d, C-2), 83.1 [s,  $\text{C}(\text{CH}_3)_3$ ], 111.4 (d, C-c), 113.5 (d, C-C), 114.7 (d, C-b), 122.6 (d, C-d), 126.6 (d, C-F), 129.2 (d, C-G), 129.8 (d, C-B), 130.4 (s, C-A), 132.8 (s, C-a), 135.7 (s, C-E), 144.0 (s, C-H), 158.4 (s, C-D), 172.3 (s, C-1).



**MS** (ESI):  $m/z$  (%) = 965 (100) [(2M+Na)<sup>+</sup>], 494 (52) [(M+Na)<sup>+</sup>], 416 (12).

**HRMS** (ESI): C<sub>25</sub>H<sub>29</sub>NO<sub>6</sub>SNa [(M+Na)<sup>+</sup>]: calcd.: 494.1608; found: 494.1609.

#### 4. Determination of the relative configuration

##### Methyl 2-[(tert-butyldimethylsilyloxy)-3-(4-methoxyphenyl)-3-(5-methylthiophen-2-yl)propanoate (**9**)

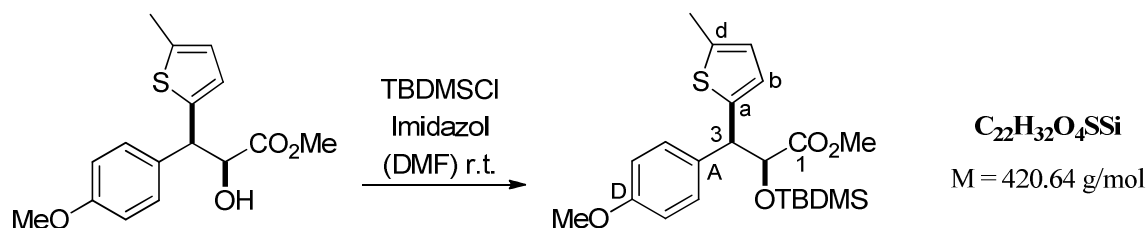

Methyl 2-hydroxy-3-(4-methoxyphenyl)-3-(5-methylthiophen-2-yl)propanoate (**7a**) (160 mg, 522  $\mu$ mol, d.r. *anti/syn* = 25/75, 1.00 eq.) was dissolved in DMF (1.5 mL) under an atmosphere of argon. Imidazole (71.1 mg, 1.04 mmol, 2.00 eq.) and TBDMSCl (320 mg, 2.13 mmol, 4.07 eq.) were subsequently added and the solution was stirred at ambient temperature over night. Water (7 mL) and Et<sub>2</sub>O (10 mL) were added and the layers were separated. The aqueous layer was extracted with Et<sub>2</sub>O (2  $\times$  10 mL). The combined organic layers were dried over Na<sub>2</sub>SO<sub>4</sub>, filtered and concentrated *in vacuo*. The crude product was purified by flash chromatography [P/Et<sub>2</sub>O = 6/1  $\rightarrow$  4/1] to afford **9** (196 mg, 466  $\mu$ mol, 89%) as a colourless oil (d.r. *anti/syn* = 24/76).

**TLC**:  $R_f$  = 0.68 (P/Et<sub>2</sub>O 2/1) [UV, CAM].

**IR** (ATR):  $\tilde{\nu}$  = 3001 (w, C<sub>ar</sub>H), 2952 (m, C<sub>al</sub>H), 2928 (m), 2856 (m), 1756 (s, C=O), 1610 (m), 1511 (s), 1466 (m, CH<sub>3</sub>), 1437 (w), 1248 (vs, COC), 1131 (s), 1036 (s), 831 (vs, C<sub>ar</sub>H), 777 (s), 727 (m), 674 cm<sup>-1</sup> (w).

*syn*-Diastereoisomer:

**<sup>1</sup>H-NMR** (360 MHz, CDCl<sub>3</sub>):  $\delta$  [ppm] = -0.28 (s, 3 H, SiMe), -0.06 (s, 3 H, SiMe), 0.83 [s, 9 H, SiC(CH<sub>3</sub>)<sub>3</sub>], 2.41 (d, <sup>4</sup> $J$  = 0.9 Hz, 3 H, H<sub>d</sub>-Me), 3.55 (s, 3 H, COOMe), 3.77 (s, 3 H, H<sub>D</sub>-OMe), 4.56 (d, <sup>3</sup> $J$  = 5.7 Hz, 1 H, H-2), 4.60 (d, <sup>3</sup> $J$  = 5.7 Hz, 1 H, H-3), 6.55 (dd, <sup>3</sup> $J$  = 3.4 Hz, <sup>4</sup> $J$  = 0.9 Hz, 1 H, H-c), 6.80-6.83 (m, 3 H, H-b + H-C), 7.22-7.24 (m, 2 H, H-B).

$^{13}\text{C-NMR}$  (90.6 MHz,  $\text{CDCl}_3$ ):  $\delta$  [ppm] = -5.8 (q, SiMe), -5.4 (q, SiMe), 15.2 (q,  $\text{C}_d\text{-Me}$ ), 18.1 [s,  $\text{SiC}(\text{CH}_3)_3$ ], 25.6 [q,  $\text{SiC}(\text{CH}_3)_3$ ], 50.6 (d, C-3), 51.7 (q, COOMe), 55.3 (q,  $\text{C}_D\text{-OMe}$ ), 77.1 (d, C-2), 113.7 (d, C-C), 124.3 (d, C-c), 126.3 (d, C-b), 129.6 (d, C-B), 132.9 (s, C-A), 138.7 (s, C-d), 139.9 (s, C-a), 158.5 (s, C-D), 172.4 (s, C-1).

*anti*-Diastereoisomer:

$^1\text{H-NMR}$  (360 MHz,  $\text{CDCl}_3$ ):  $\delta$  [ppm] = -0.29 (s, 3 H, SiMe), 0.02 (s, 3 H, SiMe), 0.92 [s, 9 H,  $\text{SiC}(\text{CH}_3)_3$ ], 2.39 (d,  $^4J = 0.9$  Hz, 3 H,  $\text{H}_d\text{-Me}$ ), 3.57 (s, 3 H, COOMe), 3.78 (s, 3 H,  $\text{H}_D\text{-OMe}$ ), 4.49 (d,  $^3J = 7.1$  Hz, 1 H, H-3), 4.63 (d,  $^3J = 7.1$  Hz, 1 H, H-2), 6.52 (dd,  $^3J = 3.4$  Hz,  $^4J = 0.9$  Hz, 1 H, H-c), 6.63 (d,  $^3J = 3.4$  Hz, 1 H, H-b), 6.80-6.83 (m, 2 H, H-C), 7.31-7.34 (m, 2 H, H-B).

$^{13}\text{C-NMR}$  (90.6 MHz,  $\text{CDCl}_3$ ):  $\delta$  [ppm] = -5.7 (q, SiMe), -5.4 (q, SiMe), 15.2 (q,  $\text{C}_d\text{-Me}$ ), 18.1 [s,  $\text{SiC}(\text{CH}_3)_3$ ], 25.6 [q,  $\text{SiC}(\text{CH}_3)_3$ ], 50.5 (d, C-3), 51.7 (q, COOMe), 55.2 (q,  $\text{C}_D\text{-OMe}$ ), 77.1 (d, C-2), 113.6 (d, C-C), 124.5 (d, C-c), 125.1 (d, C-b), 130.1 (d, C-B), 132.3 (s, C-A), 138.6 (s, C-d), 141.6 (s, C-a), 158.6 (s, C-D), 172.4 (s, C-1).

**MS** (ESI):  $m/z$  (%) = 443 (100) [(M+Na) $^+$ ], 323 (25), 289 (10).

**HRMS** (ESI):  $\text{C}_{22}\text{H}_{32}\text{O}_4\text{SSiNa}$  [(M+Na) $^+$ ]: calcd.: 443.1683; found: 443.1683.

### 1-(4-methoxyphenyl)-1-(5-methylthiophen-2-yl)propan-2-ol (10)<sup>[7,8]</sup>

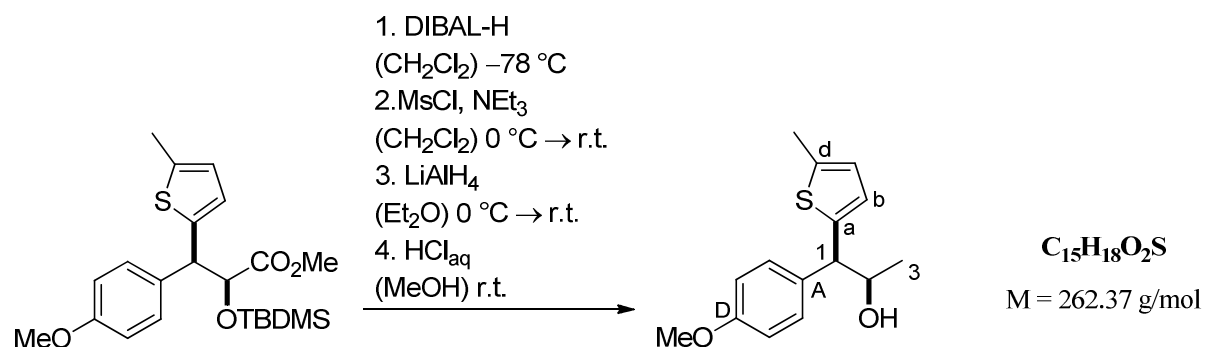

Methyl 2-[(tert-butyldimethylsilyl)oxy]-3-(4-methoxyphenyl)-3-(5-methylthiophen-2-yl)propanoate (**9**) (42.1 mg, 100  $\mu\text{mol}$ , d.r. *anti/syn* = 24/76, 1.00 eq.) was dissolved in  $\text{CH}_2\text{Cl}_2$  (1 mL) under an atmosphere of argon and cooled to -78 °C. DIBAL-H (300  $\mu\text{L}$ , 300  $\mu\text{mol}$ , 1.0 M in cyclohexane, 3.00 eq.) was added dropwise and the mixture was stirred for 1 h at -78 °C. Then, another two equivalents of DIBAL-H (200  $\mu\text{L}$ , 200  $\mu\text{mol}$ , 1.0 M in cyclohexane, 2.00 eq.) were added and after stirring for an additional hour at -78 °C another two equivalents of DIBAL-H (200  $\mu\text{L}$ , 200  $\mu\text{mol}$ , 1.0 M in cyclohexane, 2.00 eq.) were given

to the reaction mixture. After stirring for 30 min at  $-78\text{ }^{\circ}\text{C}$  the reaction was quenched by adding sat. aqueous K/Na tartrate (3 mL) and the mixture was stirred at ambient temperature over night. The mixture was extracted with  $\text{CH}_2\text{Cl}_2$  ( $3 \times 5\text{ mL}$ ). The combined organic layers were dried over  $\text{Na}_2\text{SO}_4$ , filtered and concentrated *in vacuo*. The crude product was dissolved in  $\text{CH}_2\text{Cl}_2$  (1 mL) under an atmosphere of argon and cooled to  $0\text{ }^{\circ}\text{C}$ . Methanesulfonyl chloride (8.52  $\mu\text{L}$ , 110  $\mu\text{mol}$ ) and  $\text{NEt}_3$  (20.8  $\mu\text{L}$ , 150  $\mu\text{mol}$ ) were subsequently added and the reaction was stirred at ambient temperature for 1.5 h. Water (5 mL) and  $\text{CH}_2\text{Cl}_2$  (5 mL) were added and the layers were separated. The aqueous layer was extracted with  $\text{CH}_2\text{Cl}_2$  ( $2 \times 5\text{ mL}$ ). The combined organic layers were dried over  $\text{Na}_2\text{SO}_4$ , filtered and concentrated *in vacuo*. The resulting product was dried under high vacuum and subsequently dissolved in  $\text{Et}_2\text{O}$  (1.5 mL). The solution was given to a suspension of  $\text{LiAlH}_4$  (15.2 mg, 400  $\mu\text{mol}$ ) in  $\text{Et}_2\text{O}$  (0.5 mL) under an atmosphere of argon at  $0\text{ }^{\circ}\text{C}$ . The mixture was stirred for 1 h at  $0\text{ }^{\circ}\text{C}$  and for another hour at ambient temperature. The reaction was quenched by adding sat. aqueous K/Na tartrate (5 mL) and the mixture was stirred for 30 min at ambient temperature and diluted with  $\text{Et}_2\text{O}$  (5 mL). The layers were separated and the aqueous layer was extracted with  $\text{Et}_2\text{O}$  ( $2 \times 5\text{ mL}$ ). The combined organic layers were dried over  $\text{Na}_2\text{SO}_4$ , filtered and concentrated *in vacuo*. The crude product was dissolved in methanol (2 mL). Two drops of conc.  $\text{HCl}$  were added and the solution was stirred vigorously at ambient temperature for 1 h. Sat. aqueous  $\text{NaHCO}_3$  (10 mL) and  $\text{Et}_2\text{O}$  (10 mL) were added. The layers were separated and the aqueous layer was extracted with  $\text{Et}_2\text{O}$  ( $3 \times 10\text{ mL}$ ). The combined organic layers were dried over  $\text{Na}_2\text{SO}_4$ , filtered and concentrated *in vacuo*. The crude product was purified by flash chromatography [ $\text{P}/\text{Et}_2\text{O} = 2/1 \rightarrow 1/1$ ] to afford **10** (21 mg, 80.0  $\mu\text{mol}$ , 80%) as a colourless oil (d.r. *anti/syn* = 25/75).

**TLC:**  $R_f = 0.23$  ( $\text{P}/\text{Et}_2\text{O}$  7/3) [UV, CAM].

**IR** (ATR):  $\tilde{\nu} = 3484$  (br, OH), 2962 (w,  $\text{C}_{\text{al}}\text{H}$ ), 2924 (w,  $\text{C}_{\text{al}}\text{H}$ ), 2837 (w, OMe), 1609 (m), 1511 (vs), 1455 (m,  $\text{CH}_3$ ), 1246 (vs, COC), 1177 (s), 1109 (m), 1030 (s), 797  $\text{cm}^{-1}$  (vs).

*syn*-Diastereoisomer:

**$^1\text{H-NMR}$**  (360 MHz,  $\text{CDCl}_3$ ):  $\delta$  [ppm] = 1.15 (d,  $^3J = 6.1\text{ Hz}$ , 3 H, H-3), 1.83 (bs, 1 H, OH), 2.42 (d,  $^4J = 0.9\text{ Hz}$ , 3 H,  $\text{H}_d\text{-Me}$ ), 3.78 (s, 3 H, OMe), 3.93 (d,  $^3J = 8.1\text{ Hz}$ , 1 H, H-1), 4.28 (dq,  $^3J = 8.1\text{ Hz}$ ,  $^3J = 6.1\text{ Hz}$ , 1 H, H-2), 6.60 (dd,  $^3J = 3.4\text{ Hz}$ ,  $^4J = 0.9\text{ Hz}$ , 1 H, H-c), 6.77 (d,  $^3J = 3.4\text{ Hz}$ , 1 H, H-b), 6.84-6.86 (m, 2 H, H-C), 7.21-7.23 (m, 2 H, H-B).

**$^{13}\text{C-NMR}$**  (90.6 MHz,  $\text{CDCl}_3$ ):  $\delta$  [ppm] = 15.2 (q,  $\text{C}_d\text{-Me}$ ), 21.1 (q, C-3), 55.2 (q, OMe), 55.3 (d, C-1), 71.2 (d, C-2), 114.2 (d, C-C), 124.8 (d, C-c), 125.2 (d, C-b), 129.0 (d, C-B), 134.2 (s, C-A), 139.1 (s, C-d), 142.7 (s, C-a), 158.4 (s, C-D).

*anti*-Diastereoisomer:

**<sup>1</sup>H-NMR** (360 MHz, CDCl<sub>3</sub>): δ [ppm] = 1.24 (d, <sup>3</sup>J = 6.1 Hz, 3 H, H-3), 1.83 (bs, 1 H, OH), 2.41 (d, <sup>4</sup>J = 0.9 Hz, 3 H, H<sub>d</sub>-Me), 3.79 (s, 3 H, OMe), 3.94 (d, <sup>3</sup>J = 7.5 Hz, 1 H, H-1), 4.35 (dq, <sup>3</sup>J = 7.5 Hz, <sup>3</sup>J = 6.1 Hz, 1 H, H-2), 6.56 (dd, <sup>3</sup>J = 3.4 Hz, <sup>4</sup>J = 0.9 Hz, 1 H, H-c), 6.67 (d, <sup>3</sup>J = 3.4 Hz, 1 H, H-b), 6.87-6.89 (m, 2 H, H-C), 7.30-7.32 (m, 2 H, H-B).

**<sup>13</sup>C-NMR** (90.6 MHz, CDCl<sub>3</sub>): δ [ppm] = 15.2 (q, C<sub>d</sub>-Me), 21.2 (q, C-3), 54.9 (d, C-1), 55.2 (q, OMe), 71.0 (d, C-2), 114.2 (d, C-C), 124.4 (d, C-b), 124.6 (d, C-c), 129.7 (d, C-B), 132.9 (s, C-A), 138.3 (s, C-d), 143.6 (s, C-a), 158.7 (s, C-D).

**MS** (ESI): *m/z* (%) = 263 (4) [(M+H)<sup>+</sup>], 245 (100) [(M-OH)<sup>+</sup>], 233 (10), 196 (18), 165 (49).

**HRMS** (ESI): C<sub>15</sub>H<sub>19</sub>O<sub>2</sub>S [(M+H)<sup>+</sup>]: calcd.: 263.1100; found: 263.1100.

## 5. References

- [1] G. Moyna, H. J. Williams, A. I. Scott, *Synth. Commun.* **1996**, *26*, 2235-2239.
- [2] R. Imashiro, M. Seki, *J. Org. Chem.* **2004**, *69*, 4216-4226.
- [3] N. Harada, K. Ozaki, T. Yamaguchi, H. Arakawa, A. Ando, K. Oda, N. Nakanishi, M. Ohashi, T. Hashiyama, K. Tsujihara, *Heterocycles* **1997**, *46*, 241-258.
- [4] D. J. Dixon, S. V. Ley, A. Polara, T. Sheppard, *Org. Lett.* **2001**, *3*, 3749-3752.
- [5] P. R. Fleming, K. B. Sharpless, *J. Org. Chem.* **1991**, *56*, 2869-2875.
- [6] B. M. Adger, J. V. Barkley, S. Bergeron, M. W. Cappi, B. E. Flowerdew, M. P. Jackson, R. McCague, T. C. Nugent, S. M. Roberts, *J. Chem. Soc., Perkin Trans. 1* **1997**, 3501-3508.
- [7] D. Stadler, F. Mühlthau, P. Rubenbauer, E. Herdtweck, T. Bach, *Synlett* **2006**, 2573-2576.
- [8] D. Stadler, *Diploma Thesis*, Technische Universität München, **2006**.

## 6. $^1\text{H}$ - and $^{13}\text{C}$ -NMR spectra

### Methyl 3-(2,4-dimethoxyphenyl)-2-hydroxy-3-(4-methoxyphenyl)propanoate (6a)

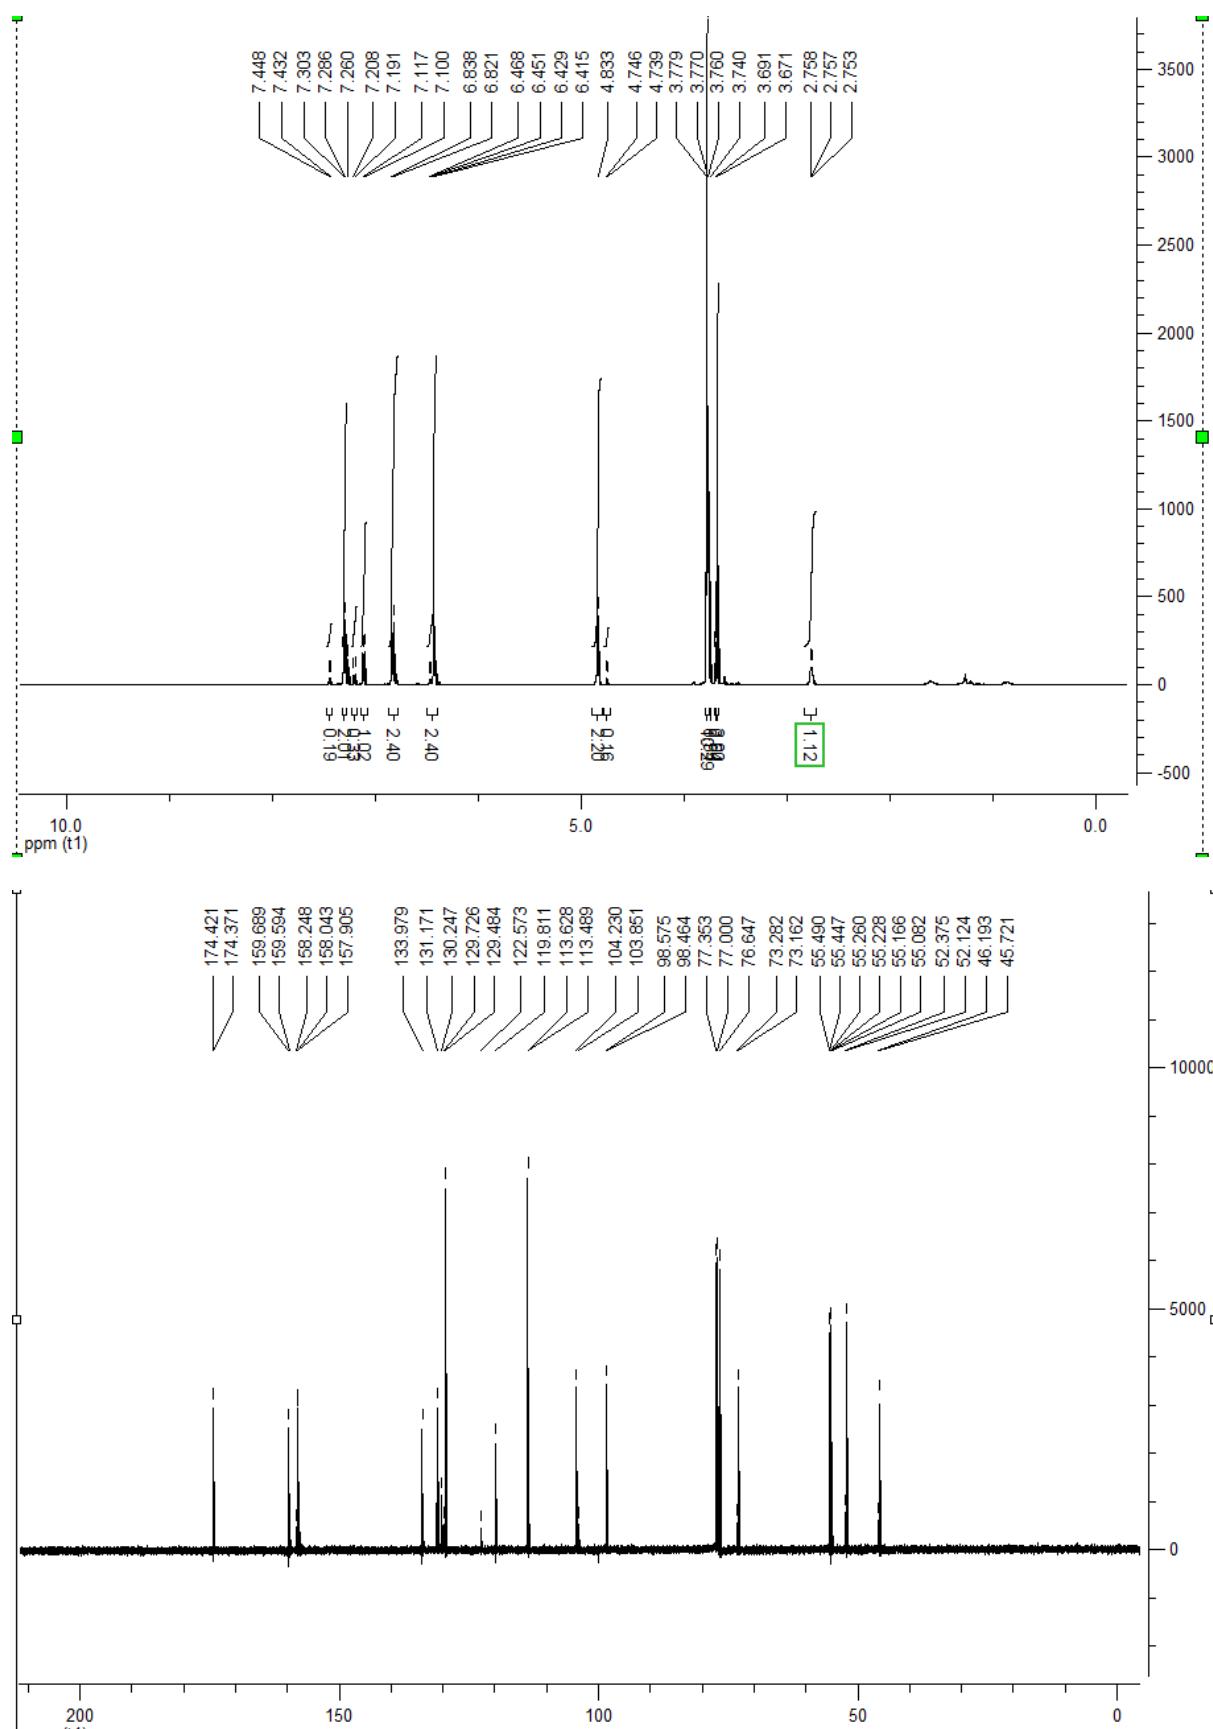

### Methyl 2-hydroxy-3-(4-methoxyphenyl)-3-(5-methylthiophen-2-yl)propanoate (7a)

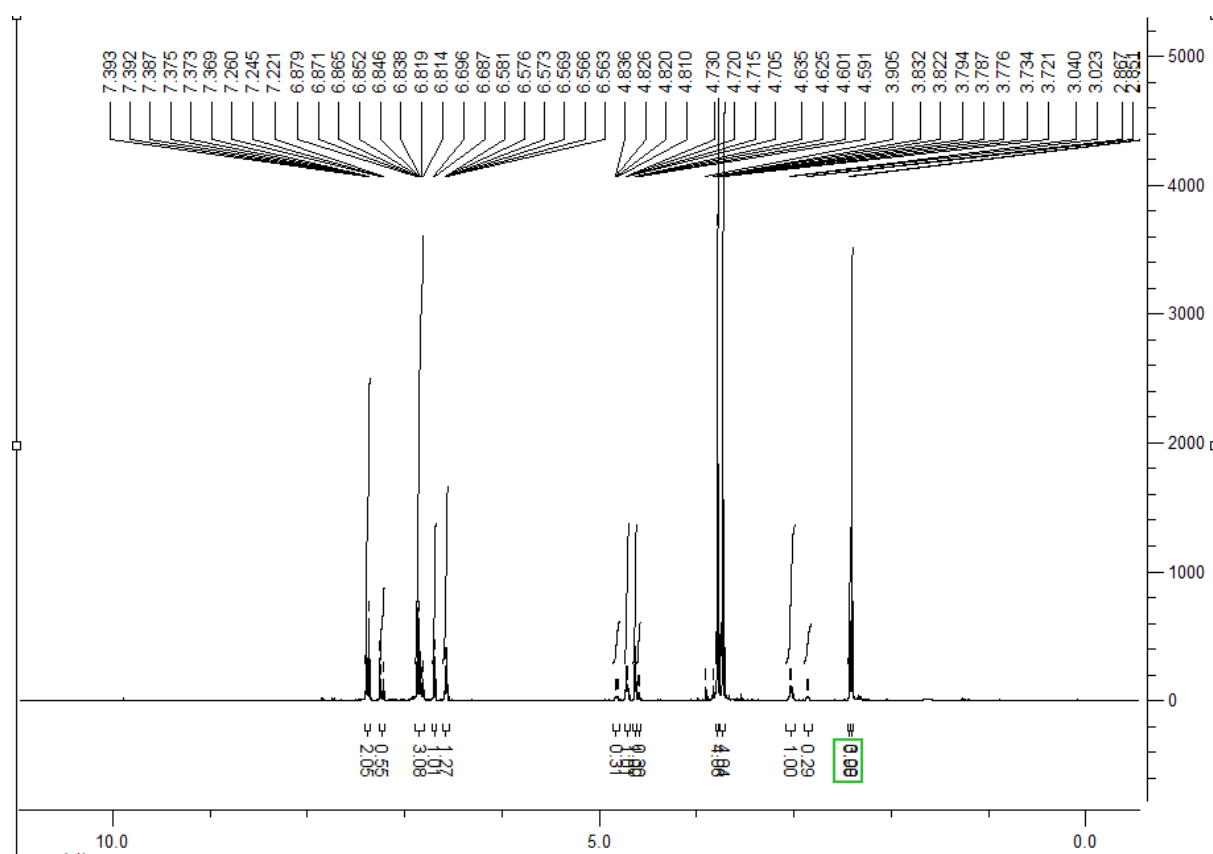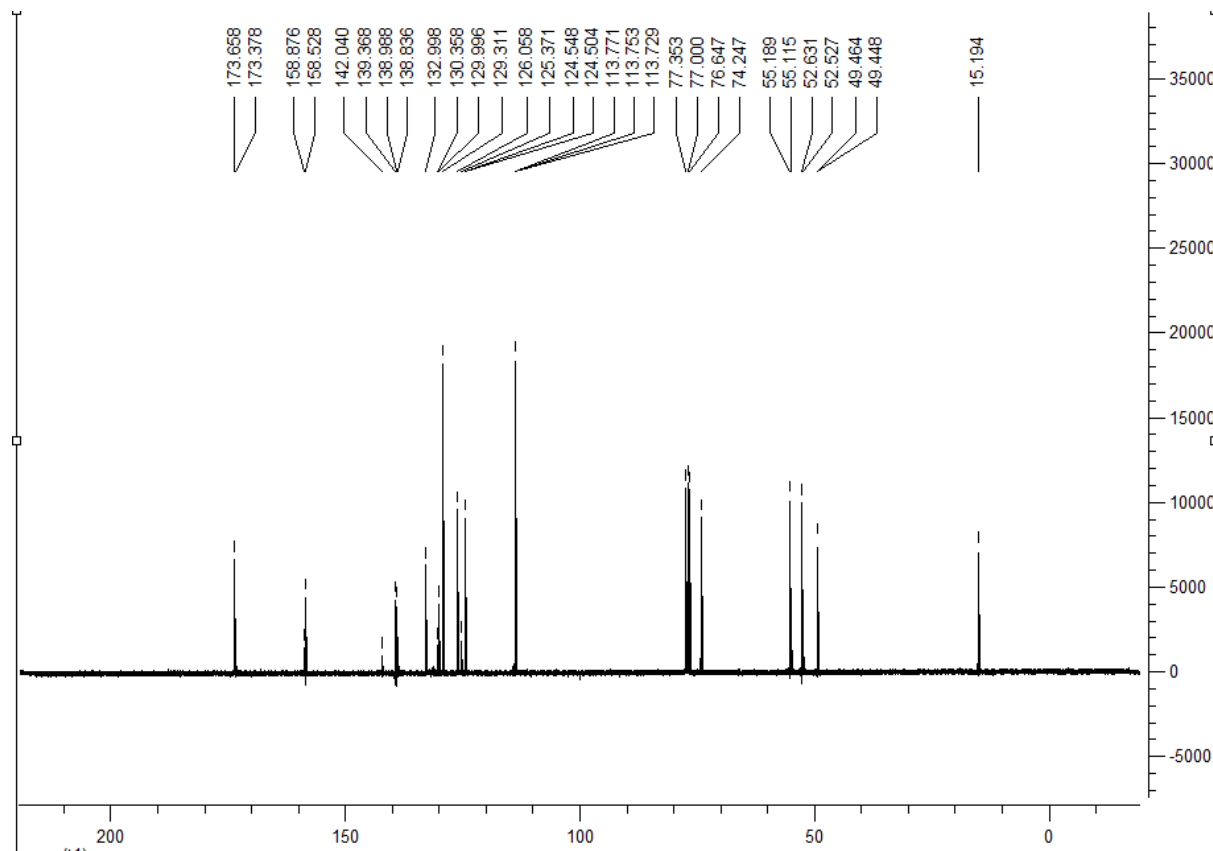

### Methyl 2-hydroxy-3-(5-methylthiophen-2-yl)-3-phenylpropanoate (7b)

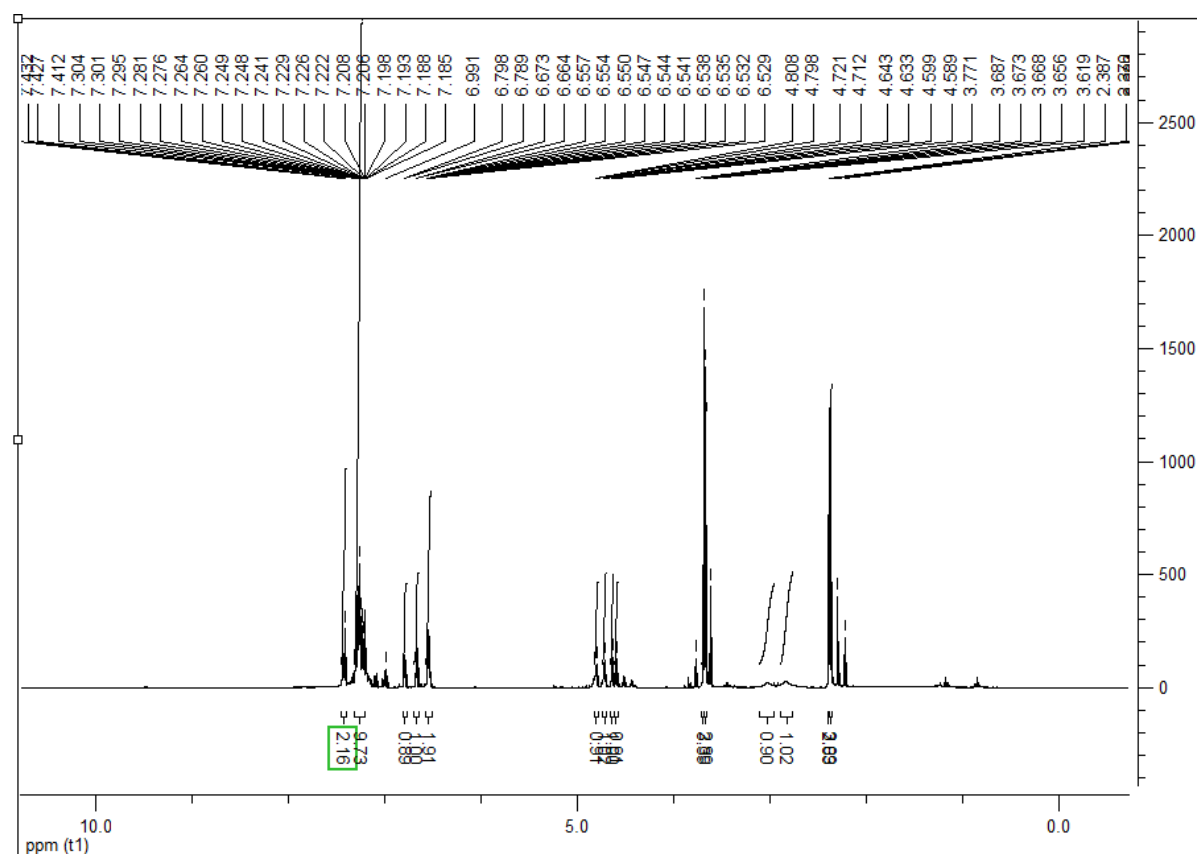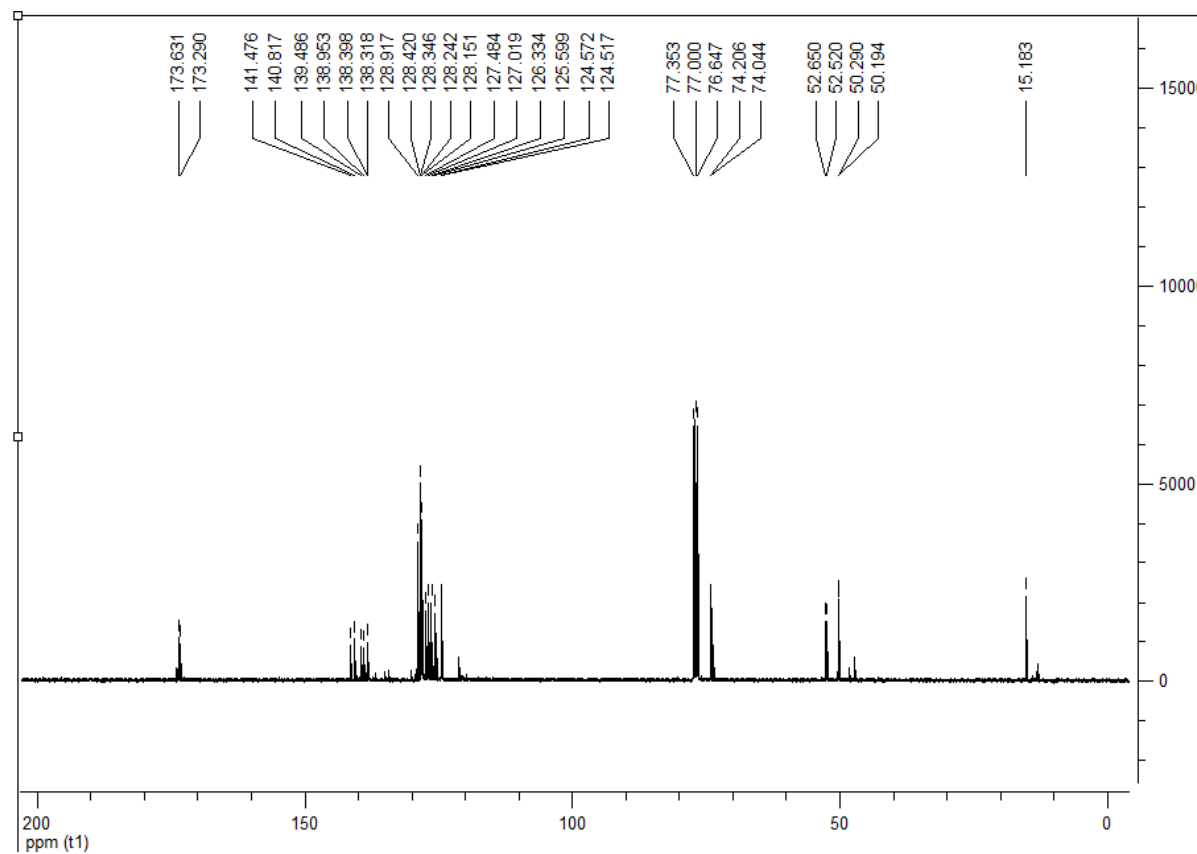



### Methyl 2-hydroxy-3-(5-methylthiophen-2-yl)-3-(*p*-tolyl)propanoate (7c)

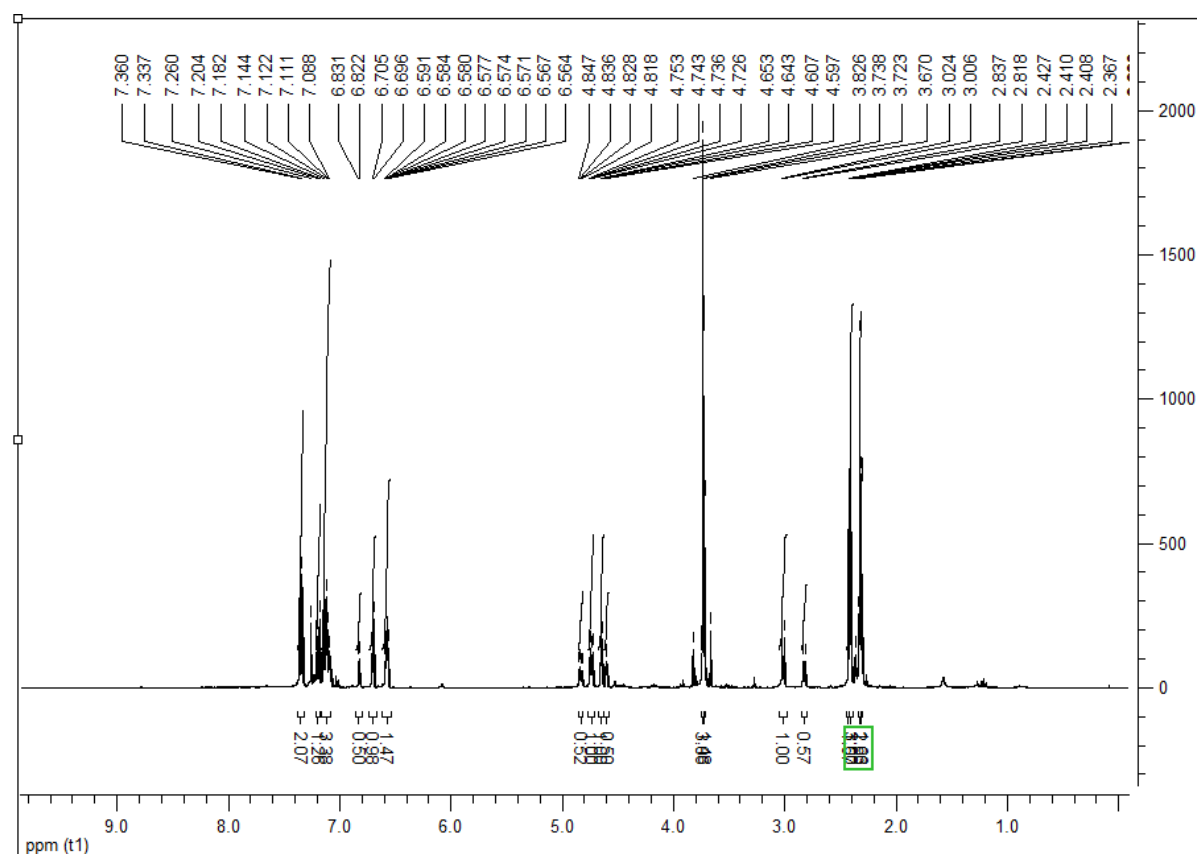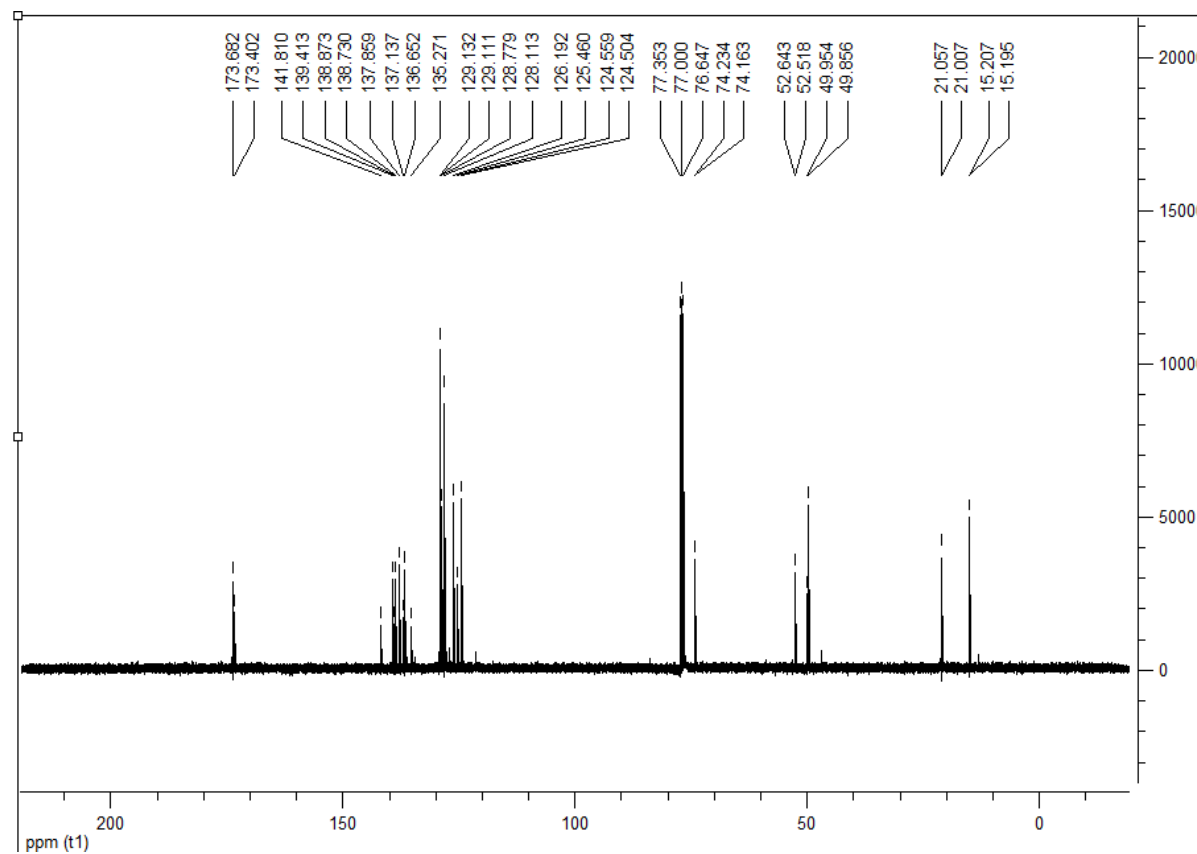

### Methyl 3-(2,4-dimethylphenyl)-2-hydroxy-3-phenylpropanoate (8b)

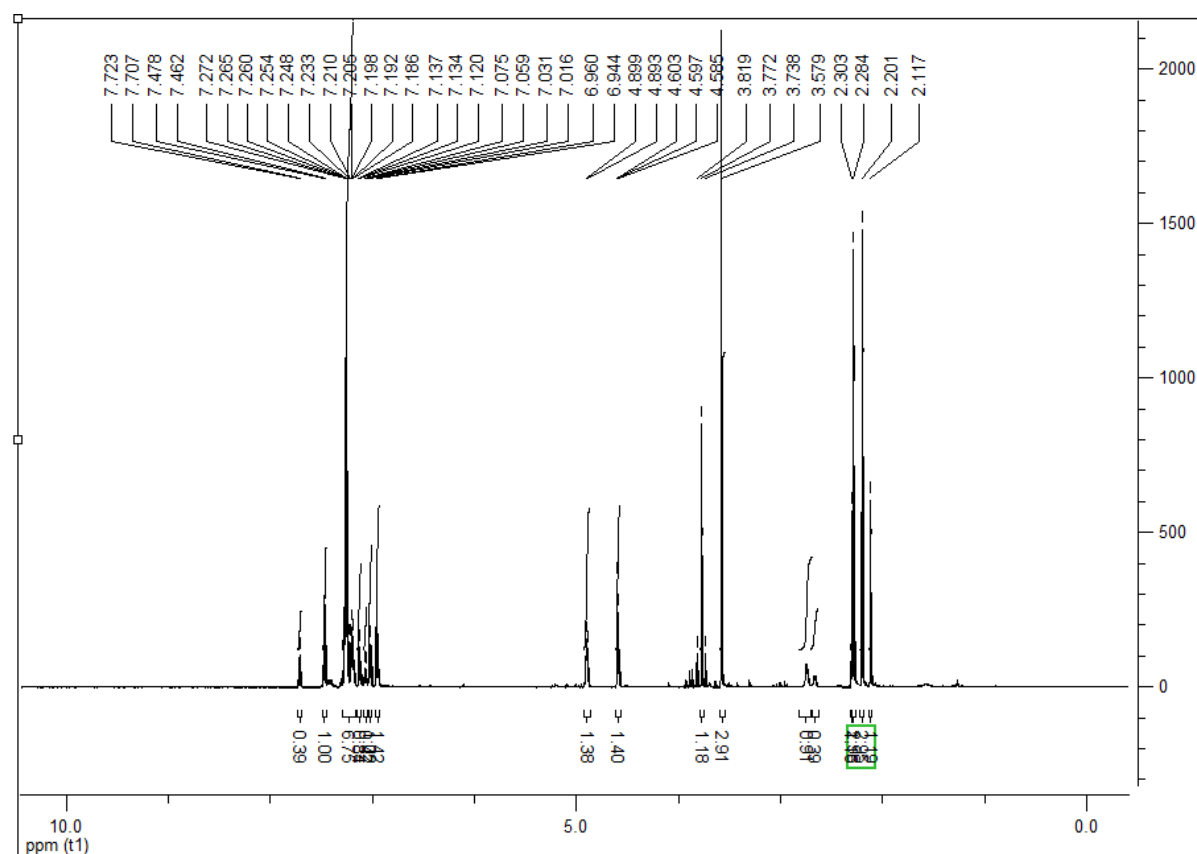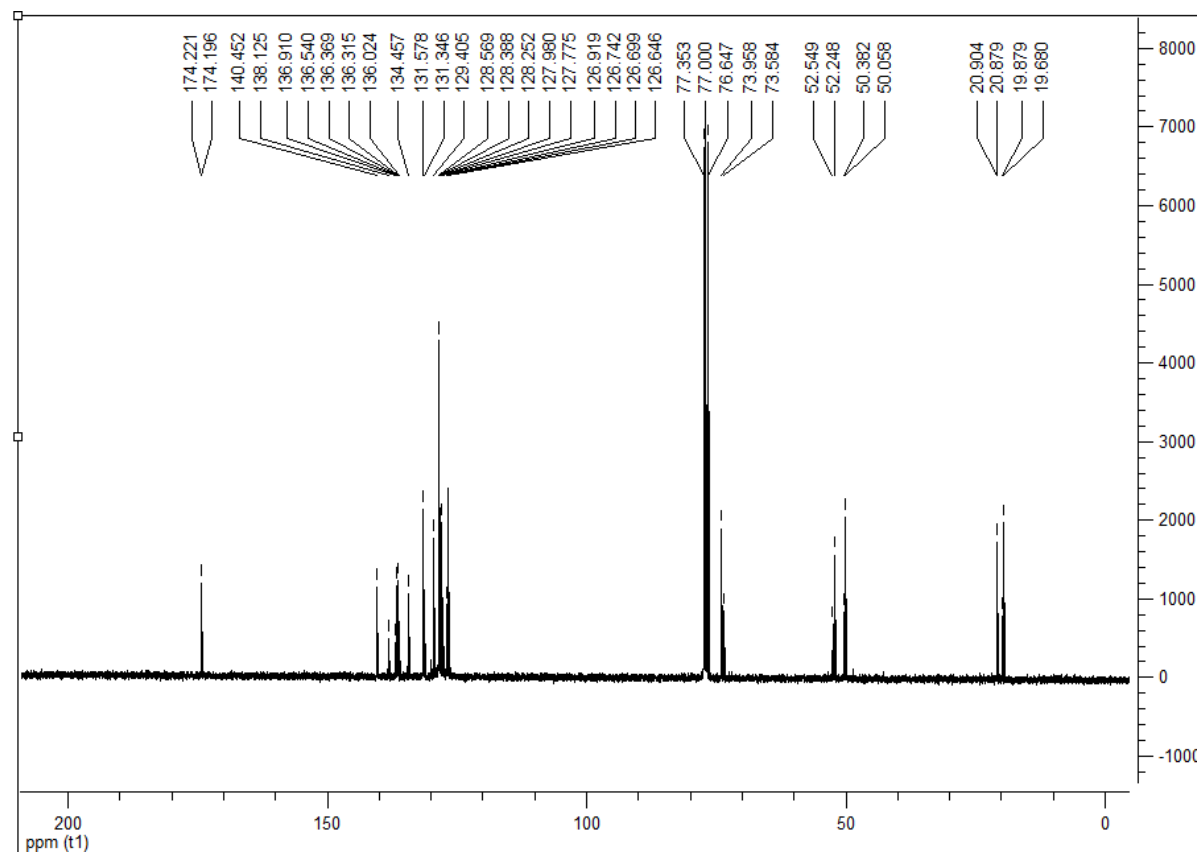

### Methyl 3-(2,4-dimethylphenyl)-2-hydroxy-3-(*p*-tolyl)propanoate (8c)

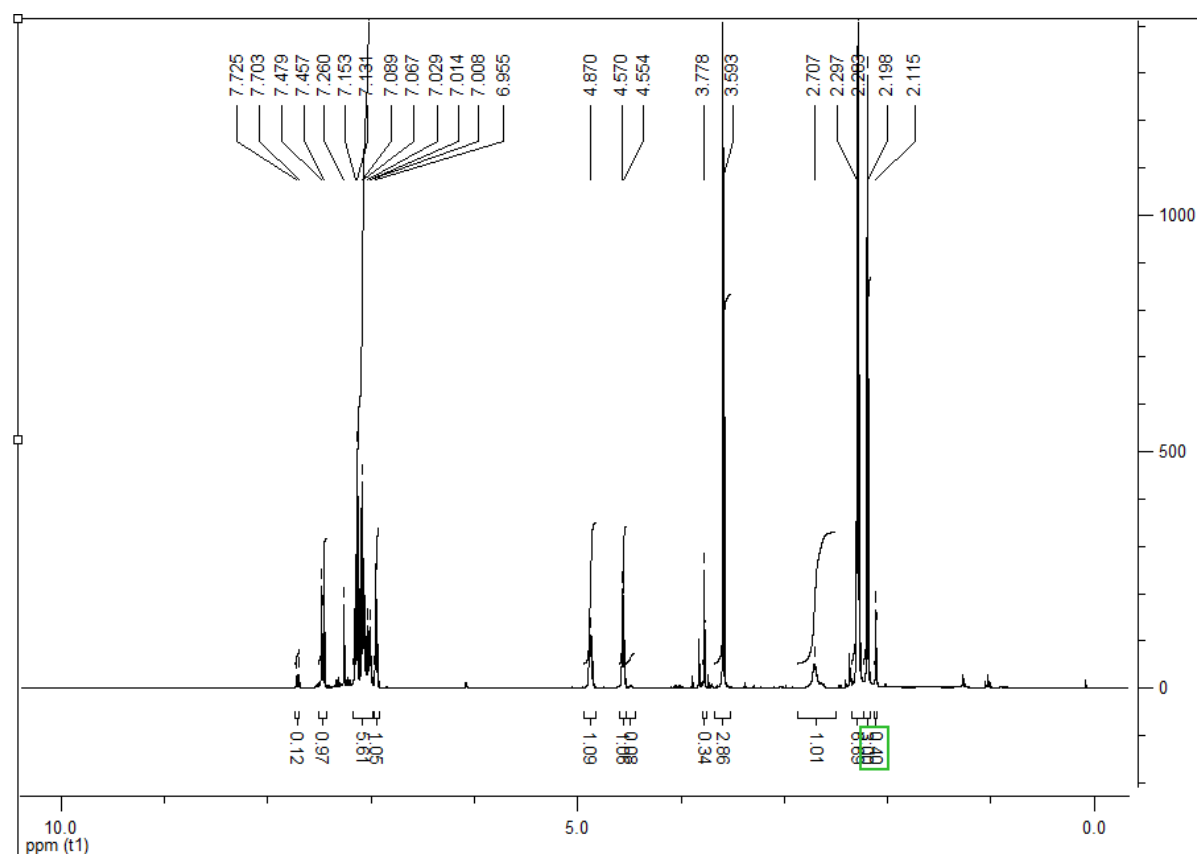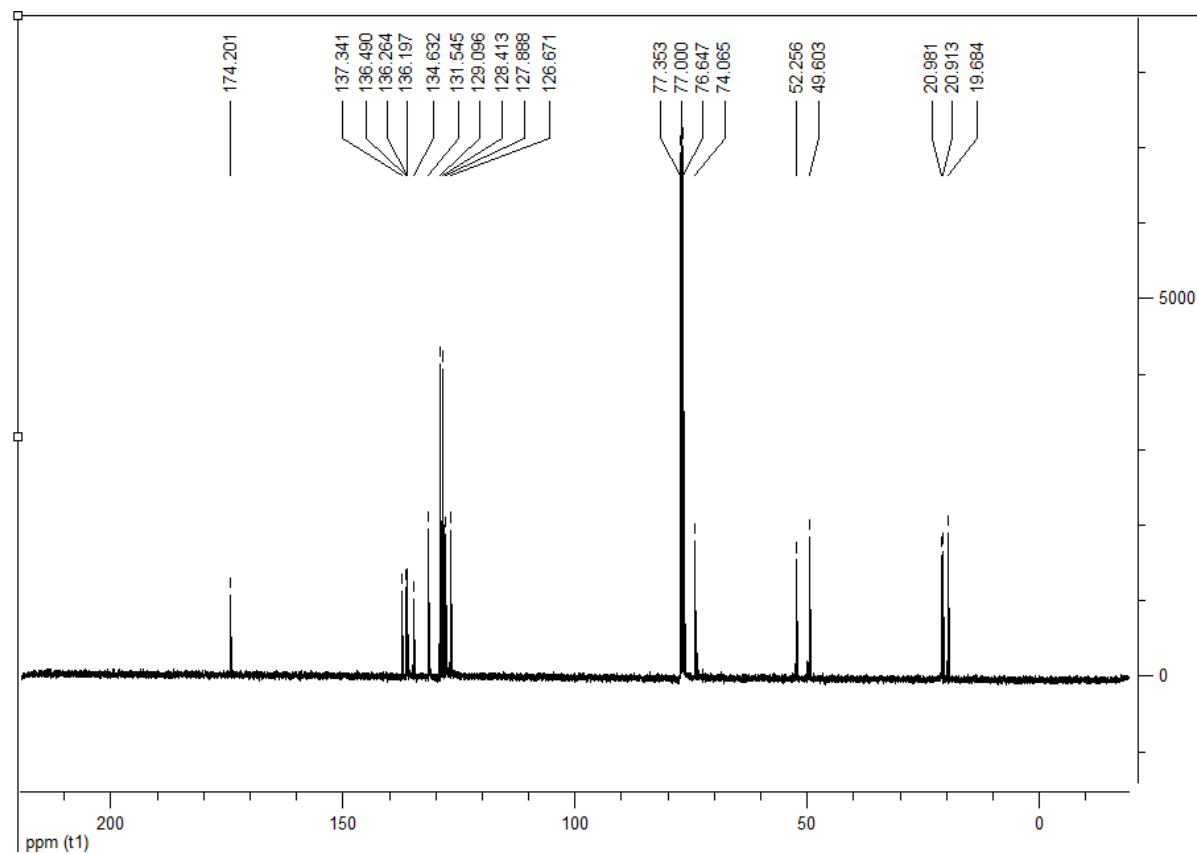

***tert*-Butyl 3-(2,4-dimethoxyphenyl)-2-hydroxy-3-(4-methoxyphenyl)propanoate (11a)**

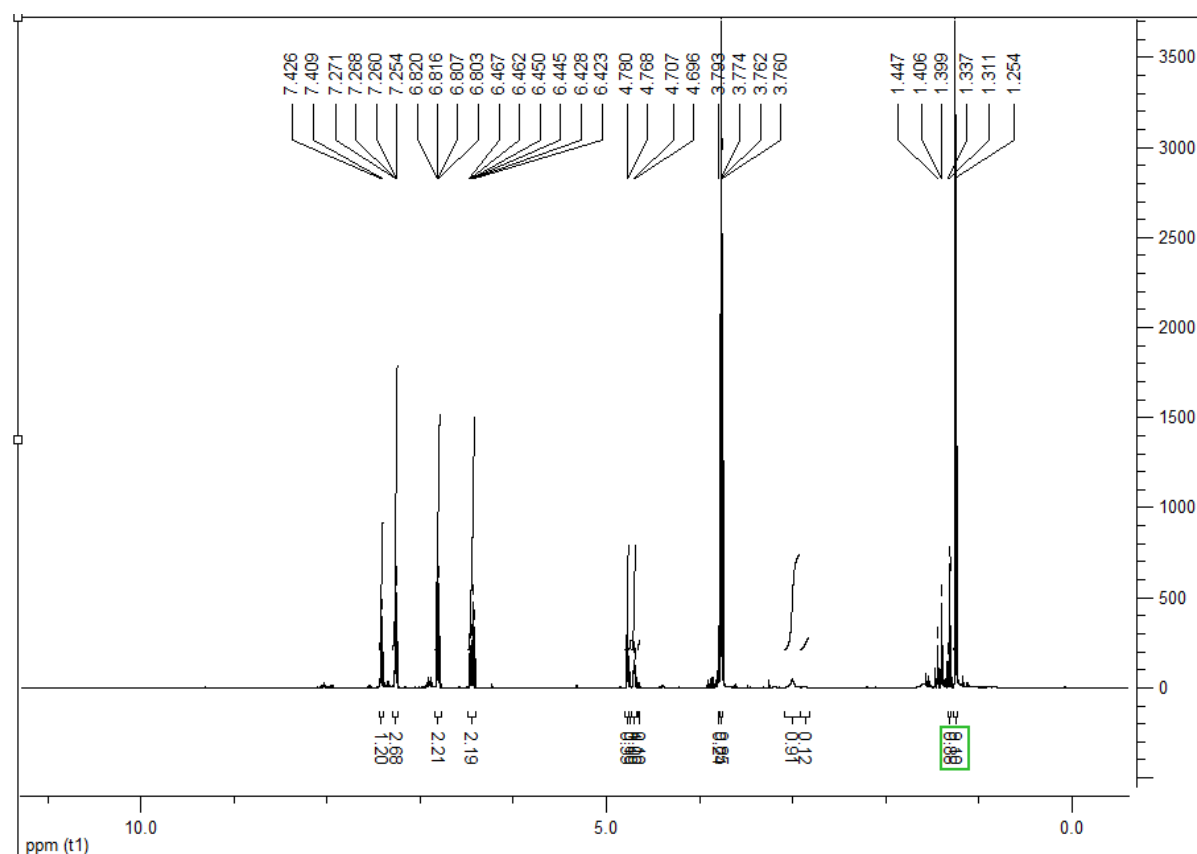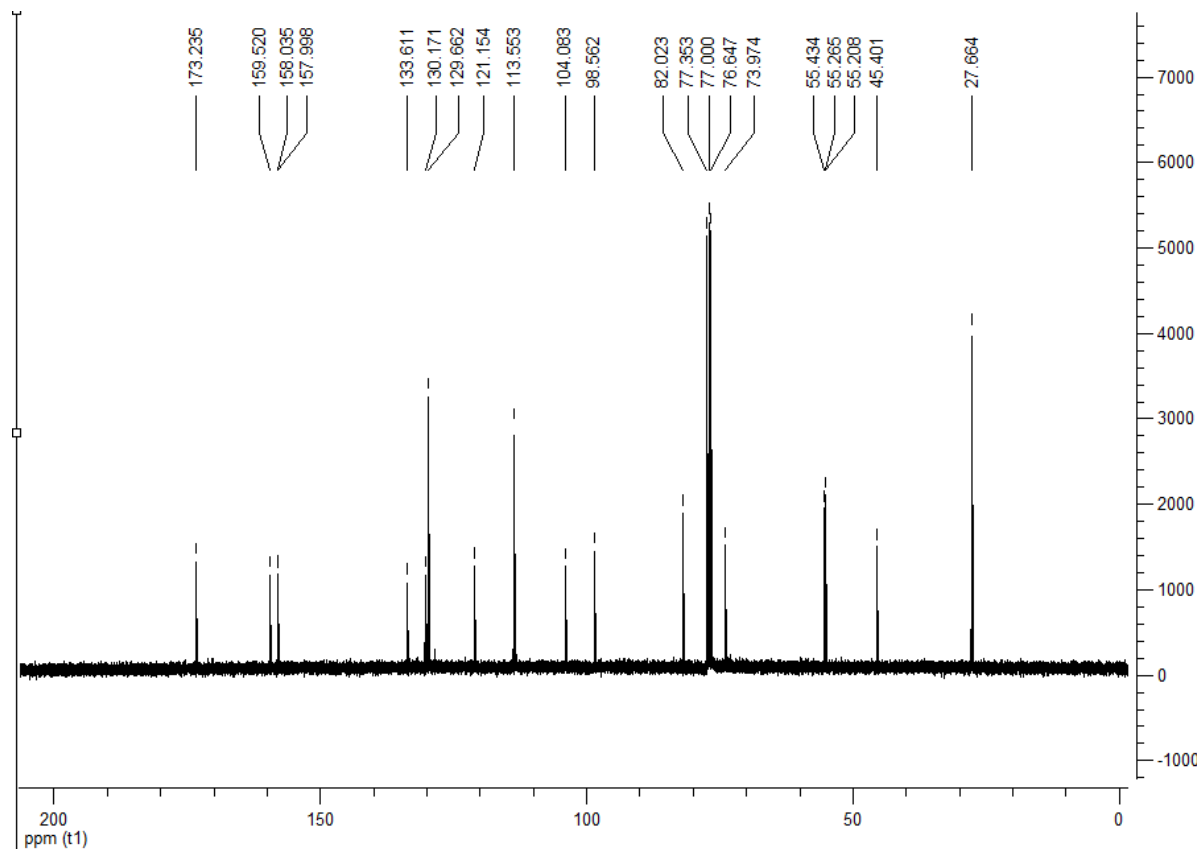

***tert*-Butyl 2-hydroxy-3-(4-methoxyphenyl)-3-(2,3,4-trimethoxyphenyl)propanoate (11b)**

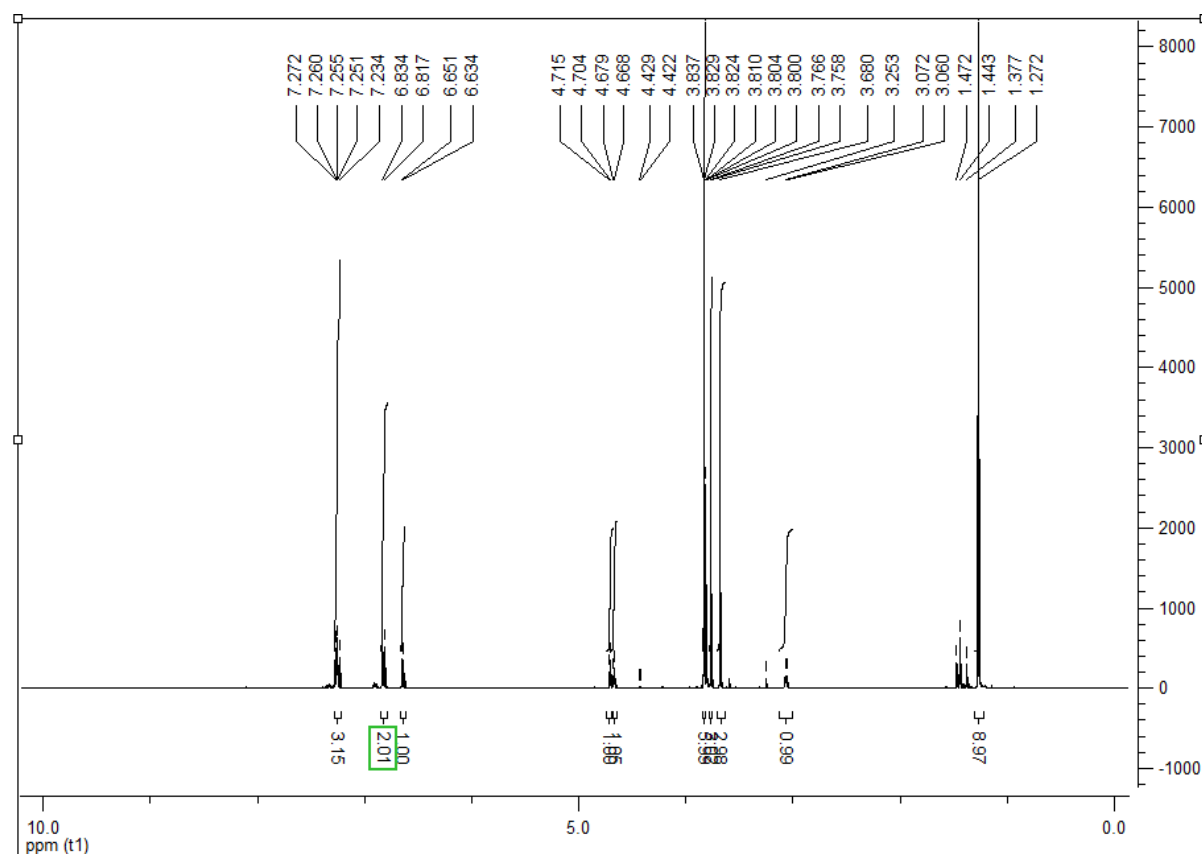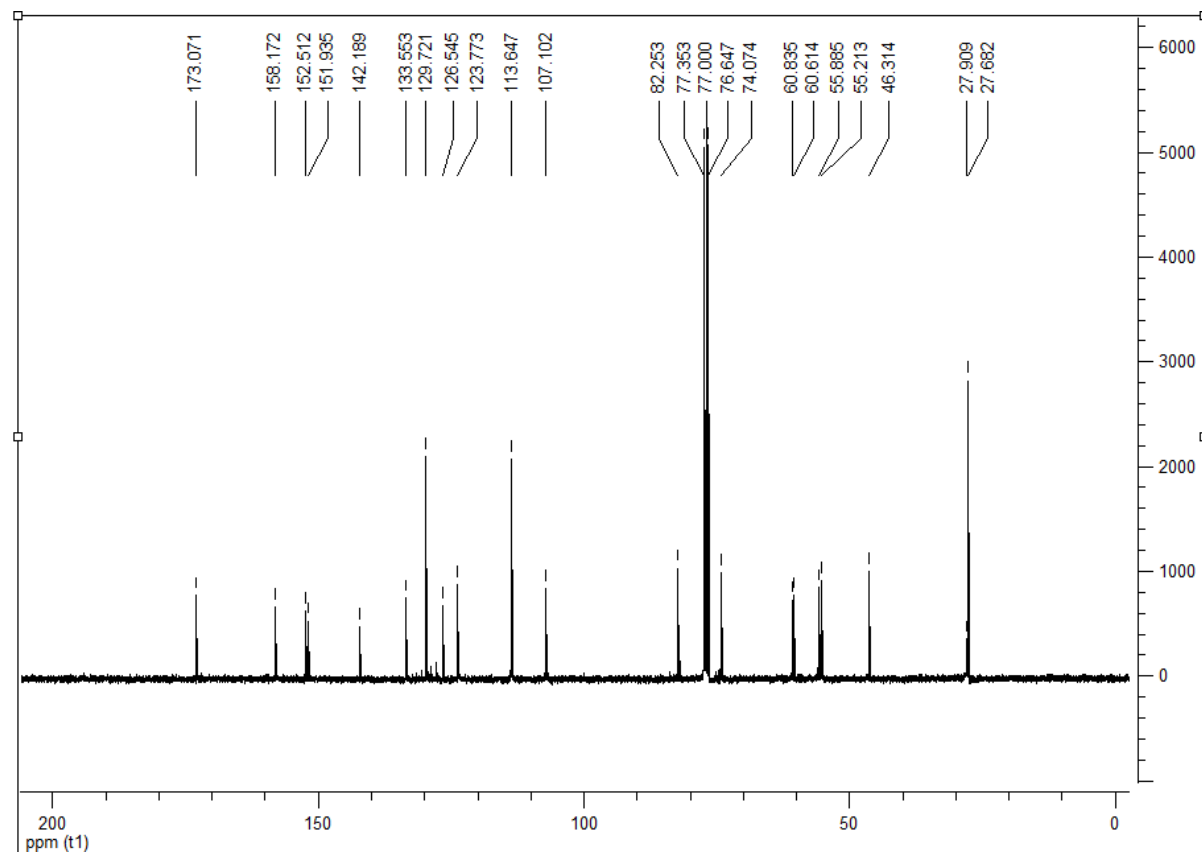

***tert*-Butyl 3-(5-bromo-2,4-dimethoxyphenyl)-2-hydroxy-3-(4-methoxyphenyl)propanoate  
(11c)**

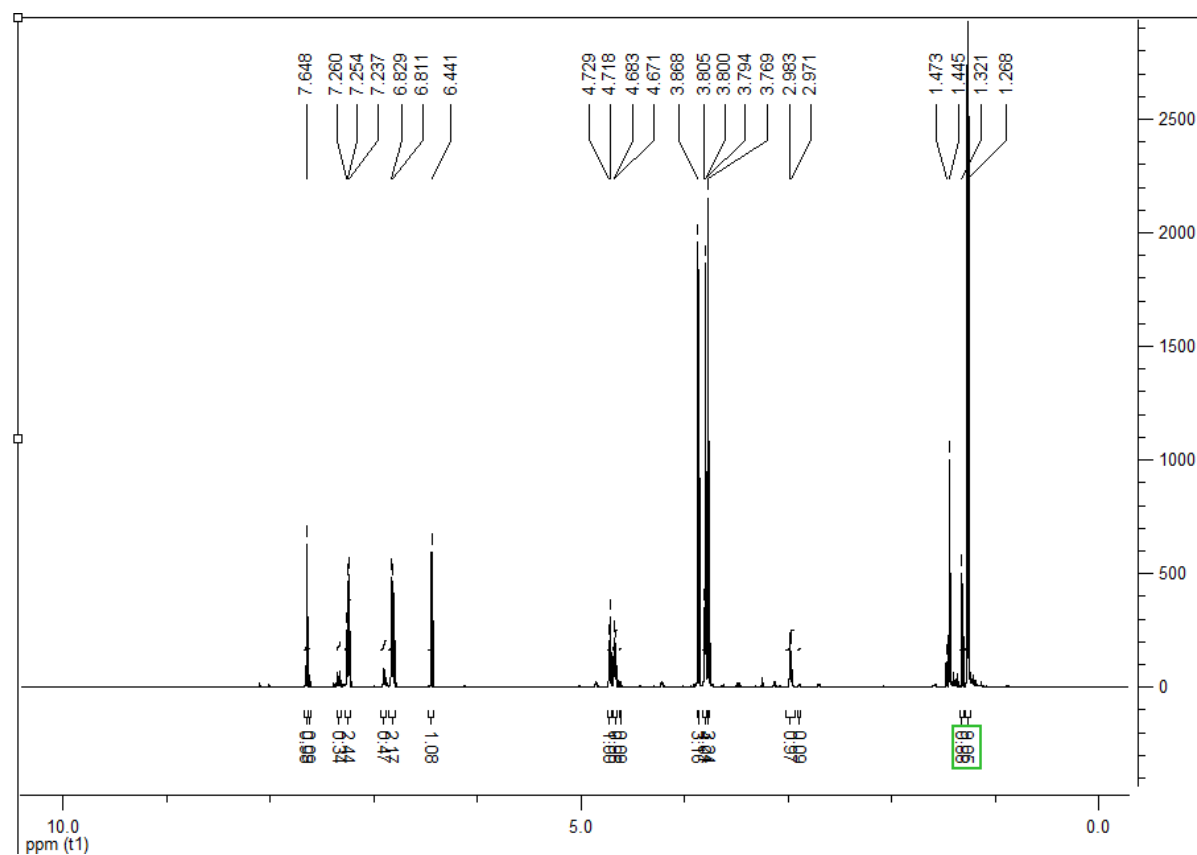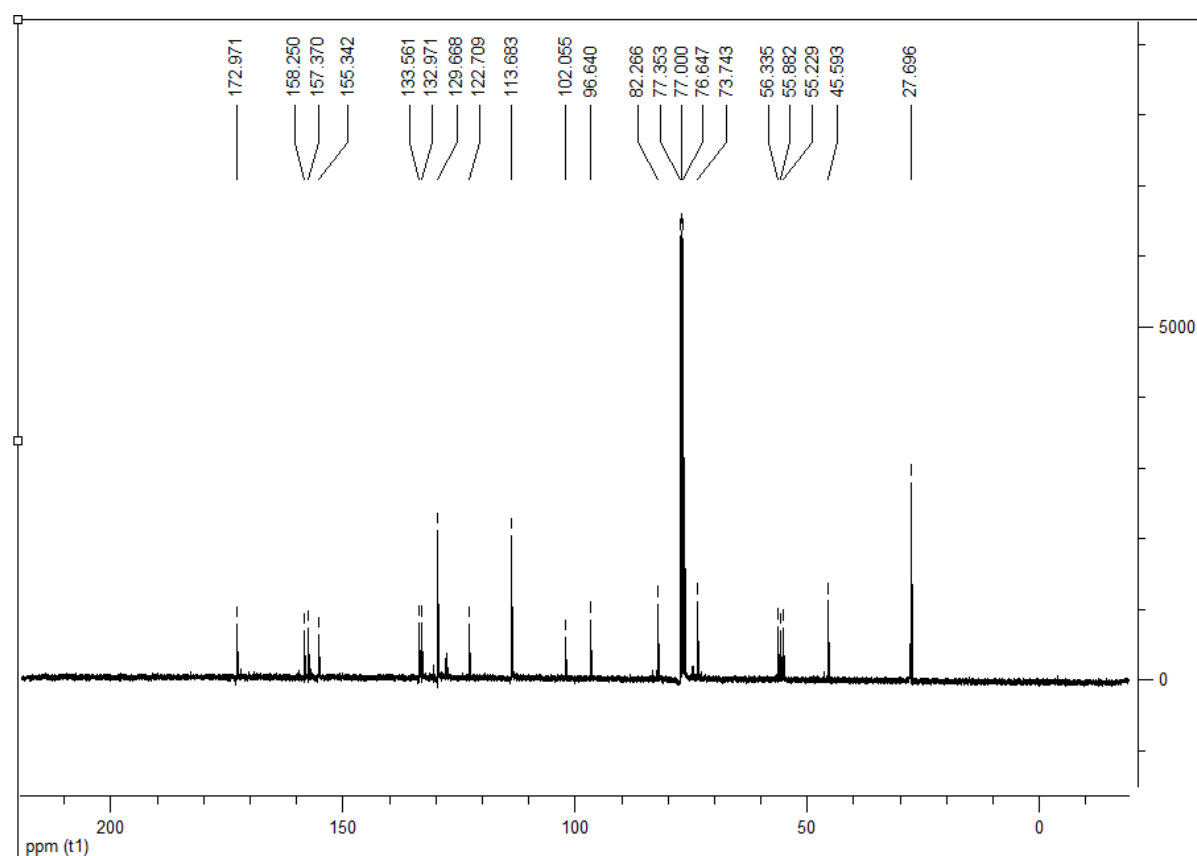

***tert*-Butyl 2-hydroxy-3-(4-methoxyphenyl)-3-(5-methylthiophen-2-yl)propanoate (11d)**

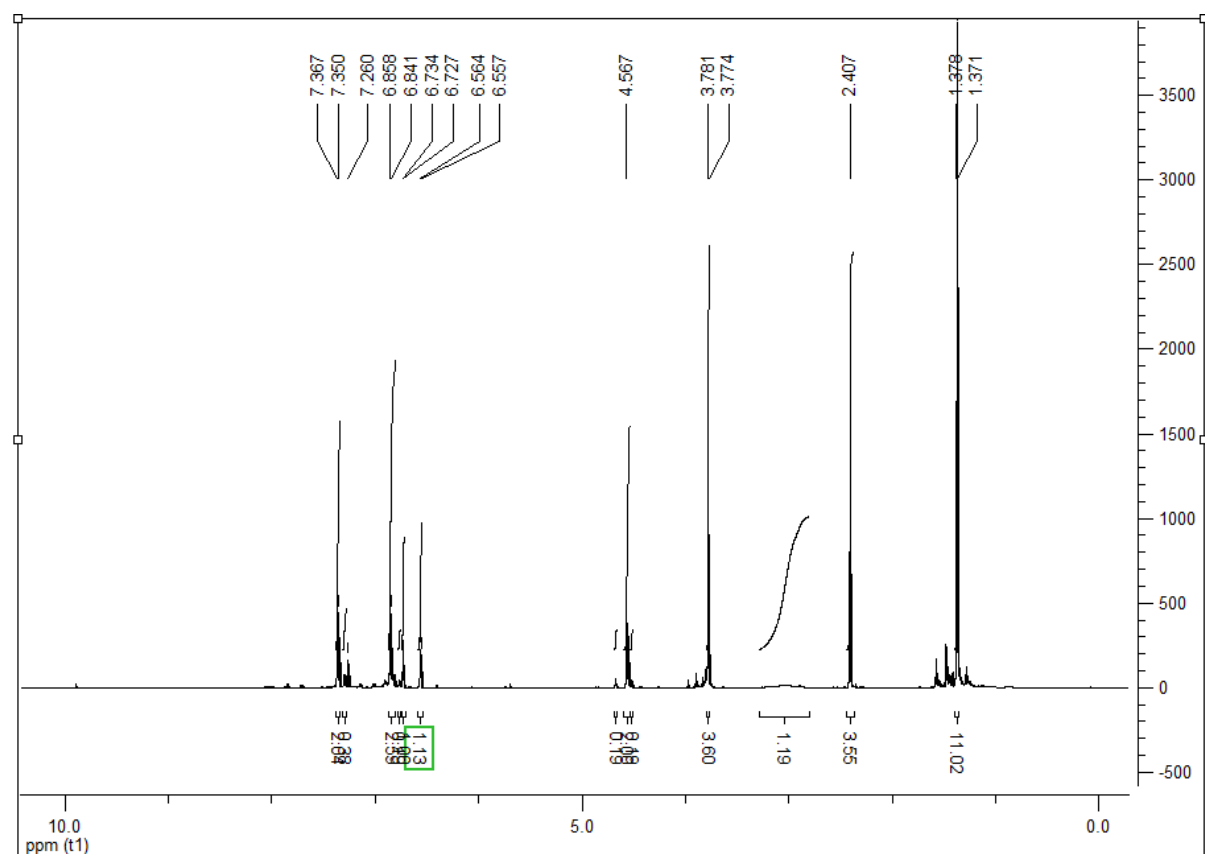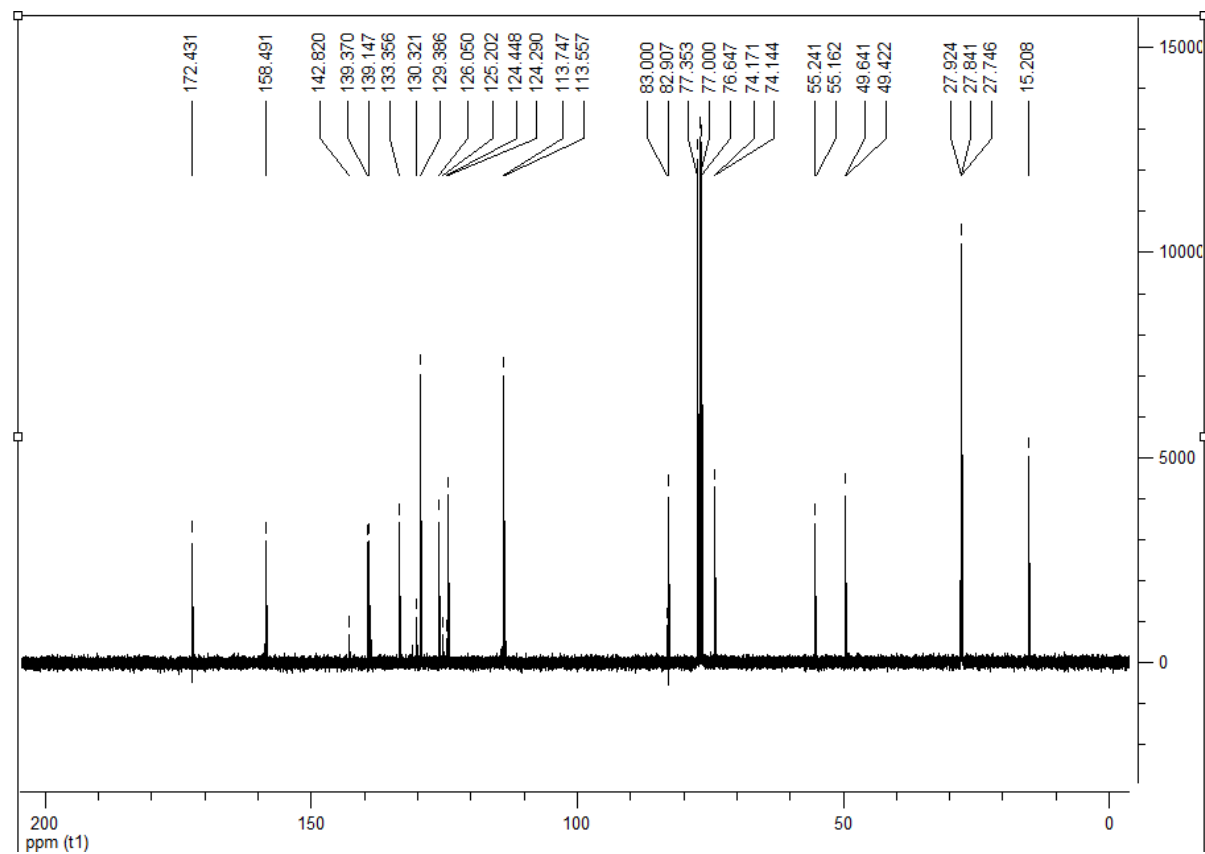

***tert*-Butyl 2-hydroxy-3-(4-methoxyphenyl)-3-(5-methylfuran-2-yl)propanoate (11e)**

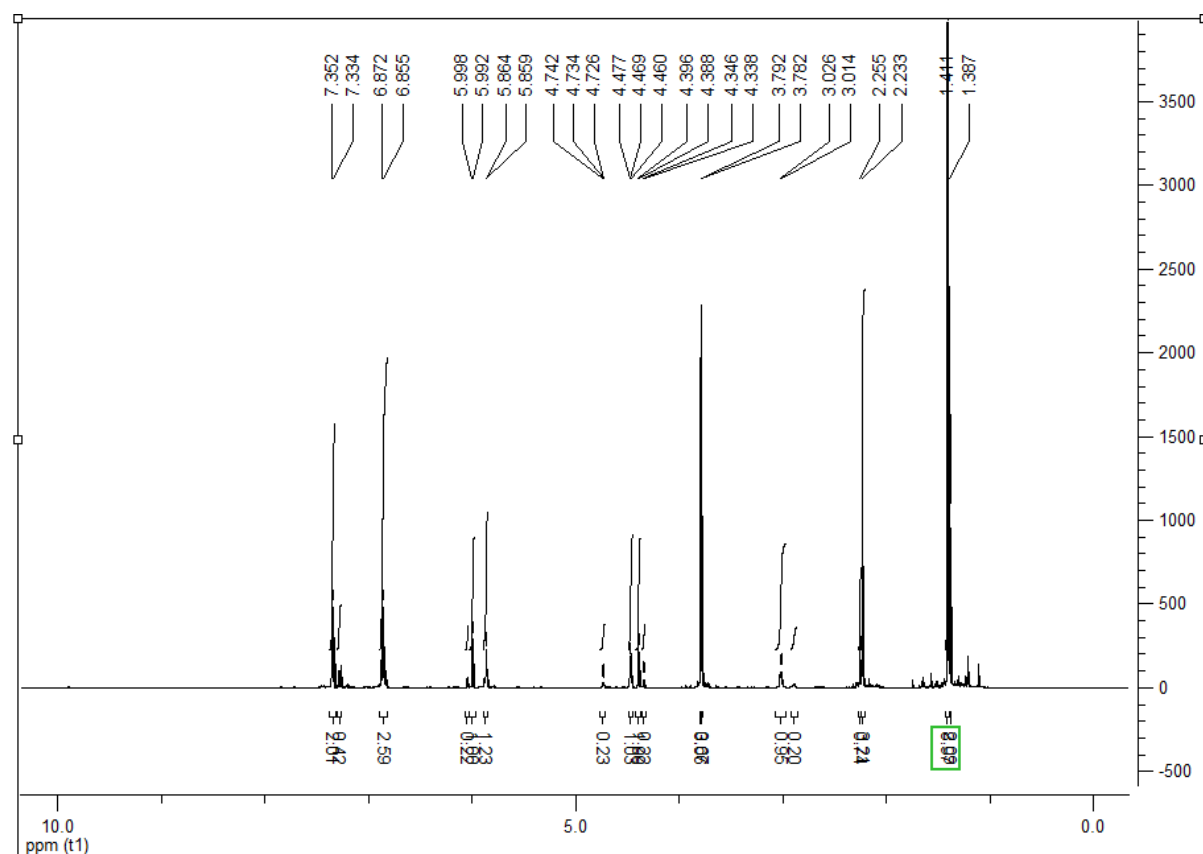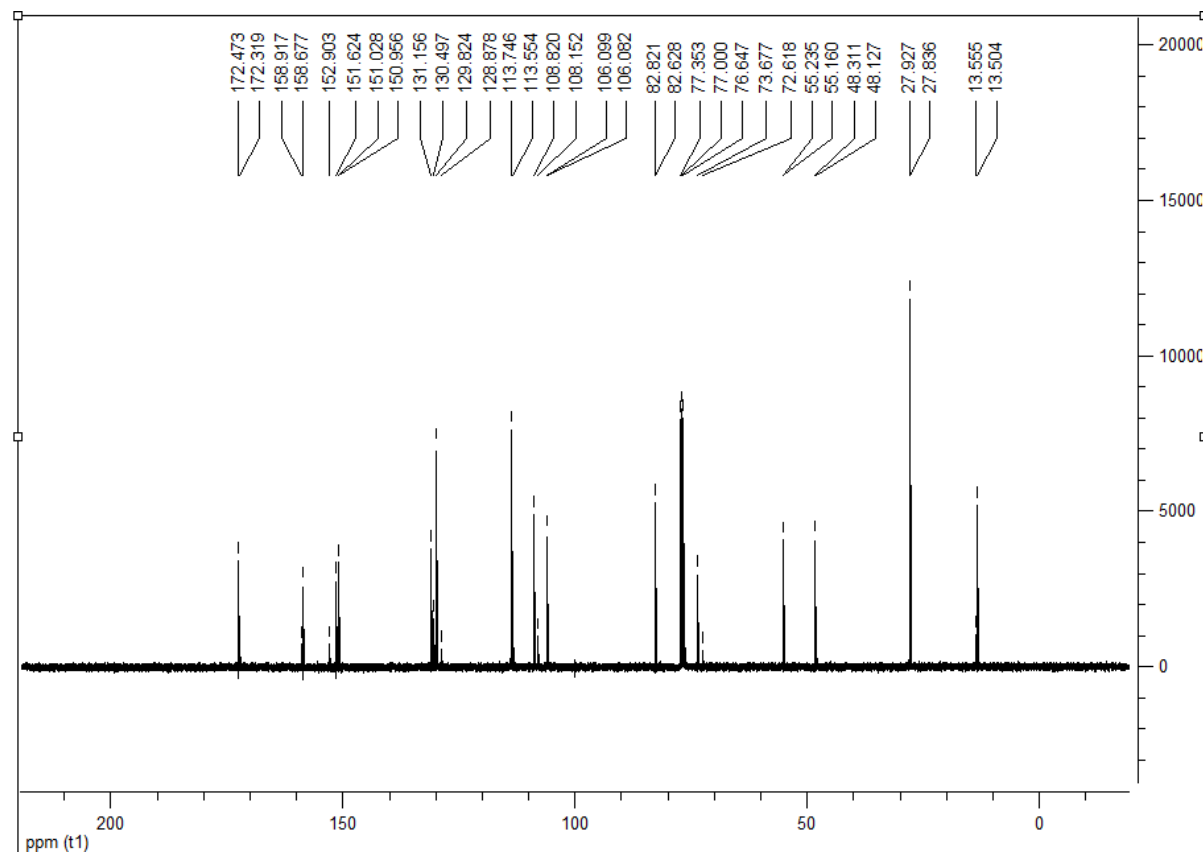



***tert*-Butyl 2-hydroxy-3-(4-methoxyphenyl)-3-(1-tosyl-1*H*-pyrrol-2-yl)propanoate (11f)**

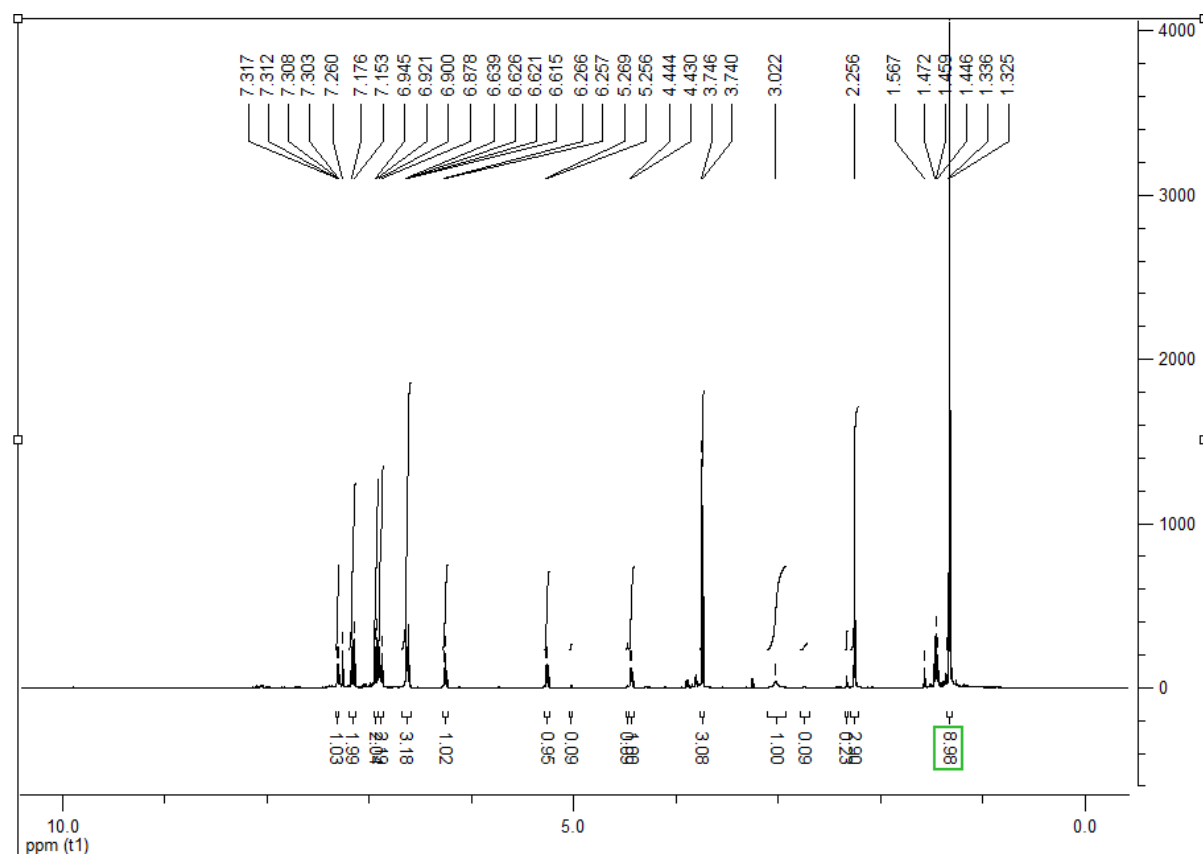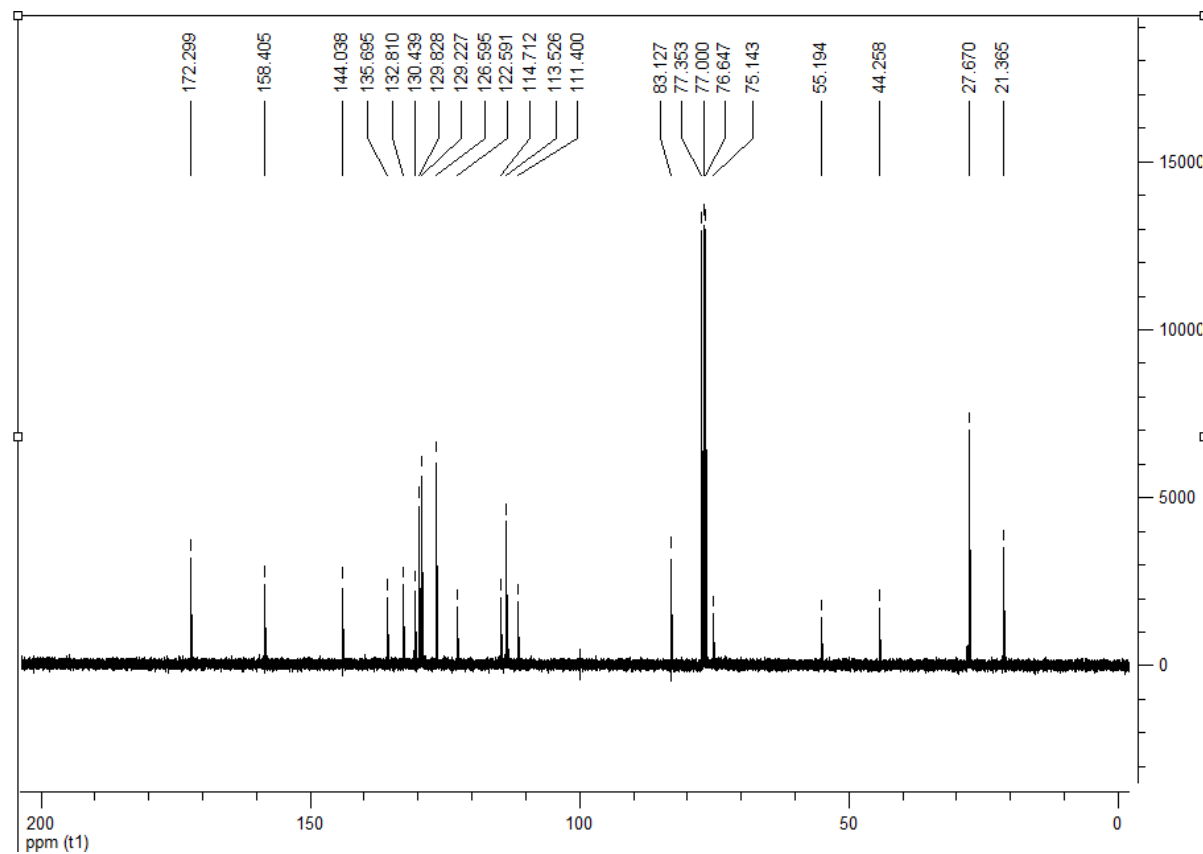

### Methyl 2-[(tert-butyldimethylsilyloxy)-3-(4-methoxyphenyl)-3-(5-methylthiophen-2-yl)propanoate (9)

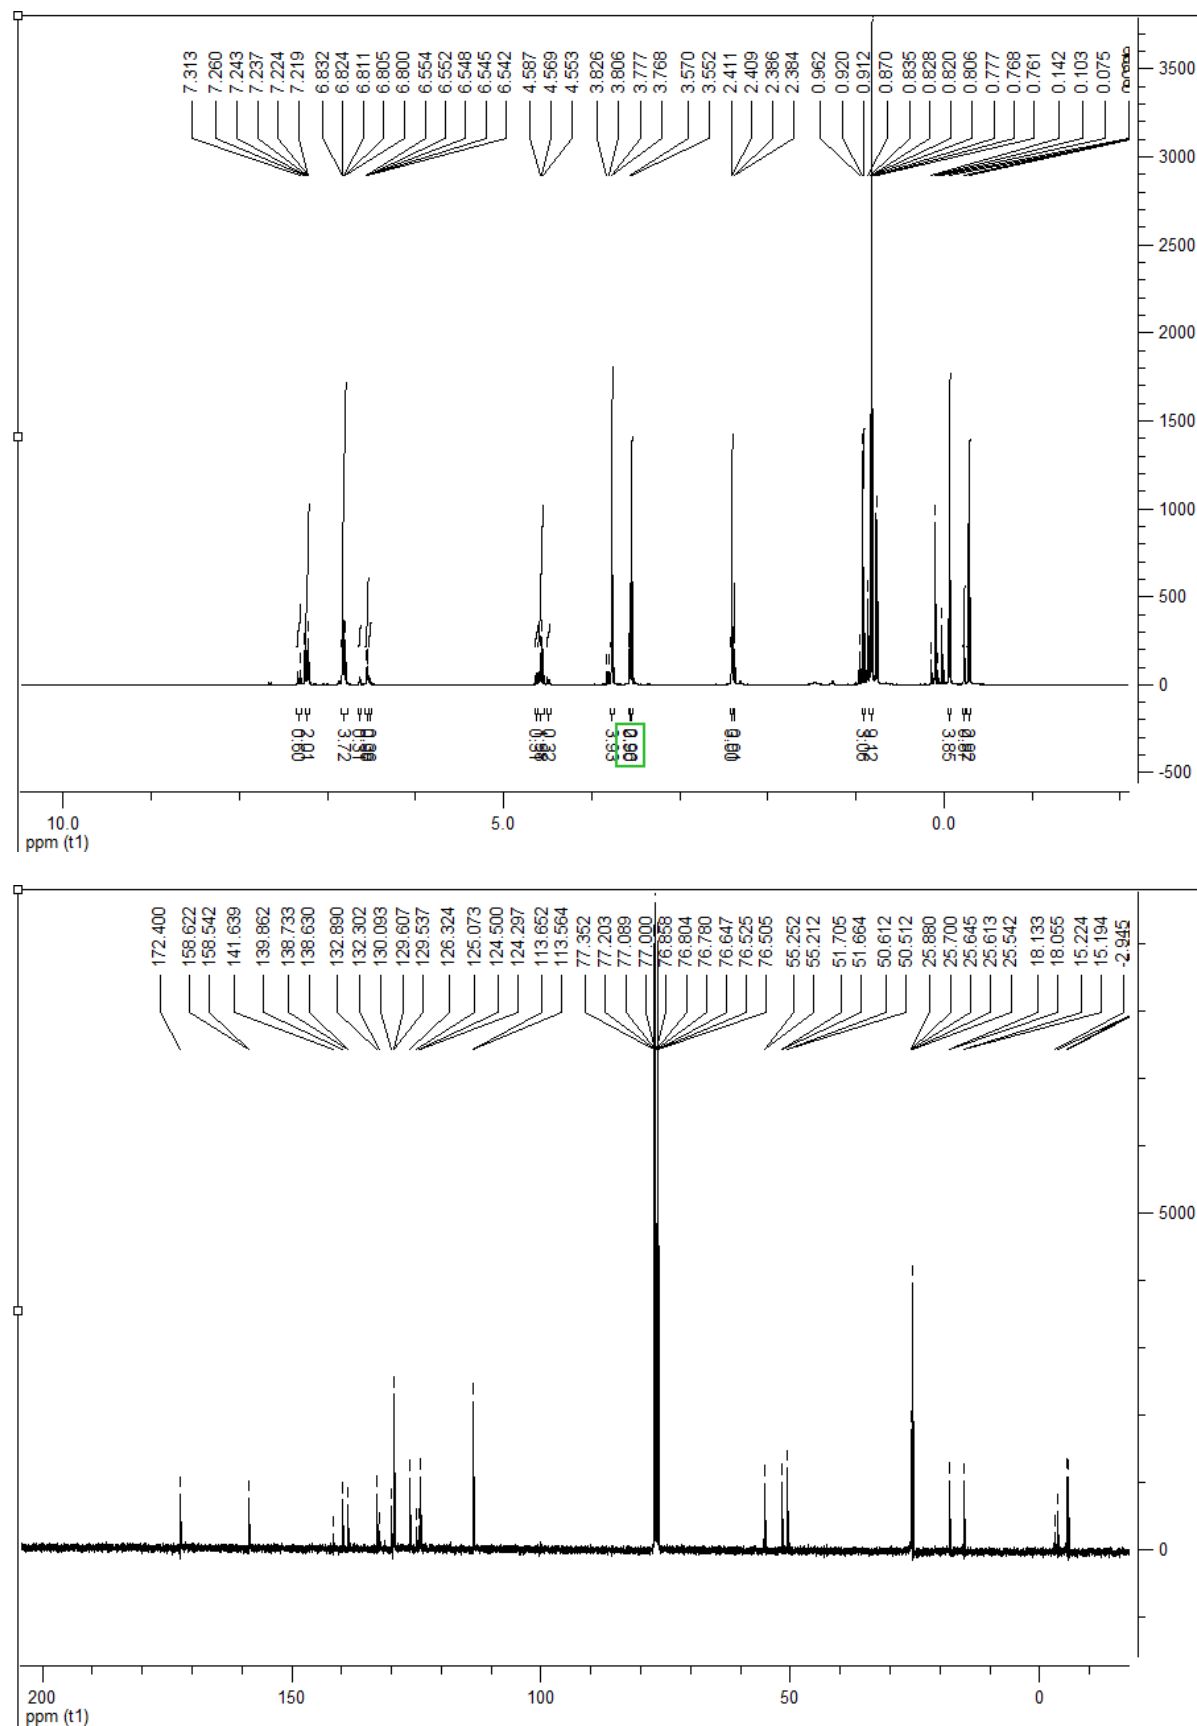

### 1-(4-methoxyphenyl)-1-(5-methylthiophen-2-yl)propan-2-ol (10)

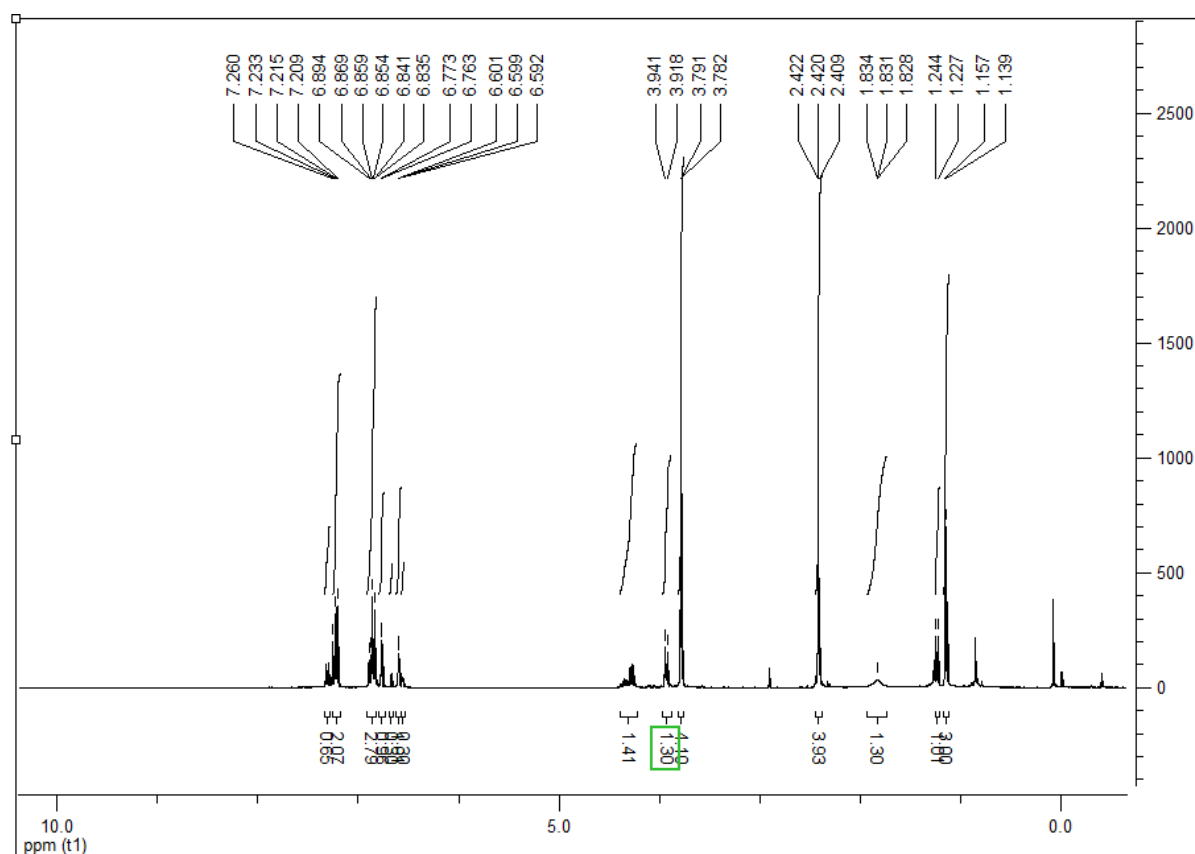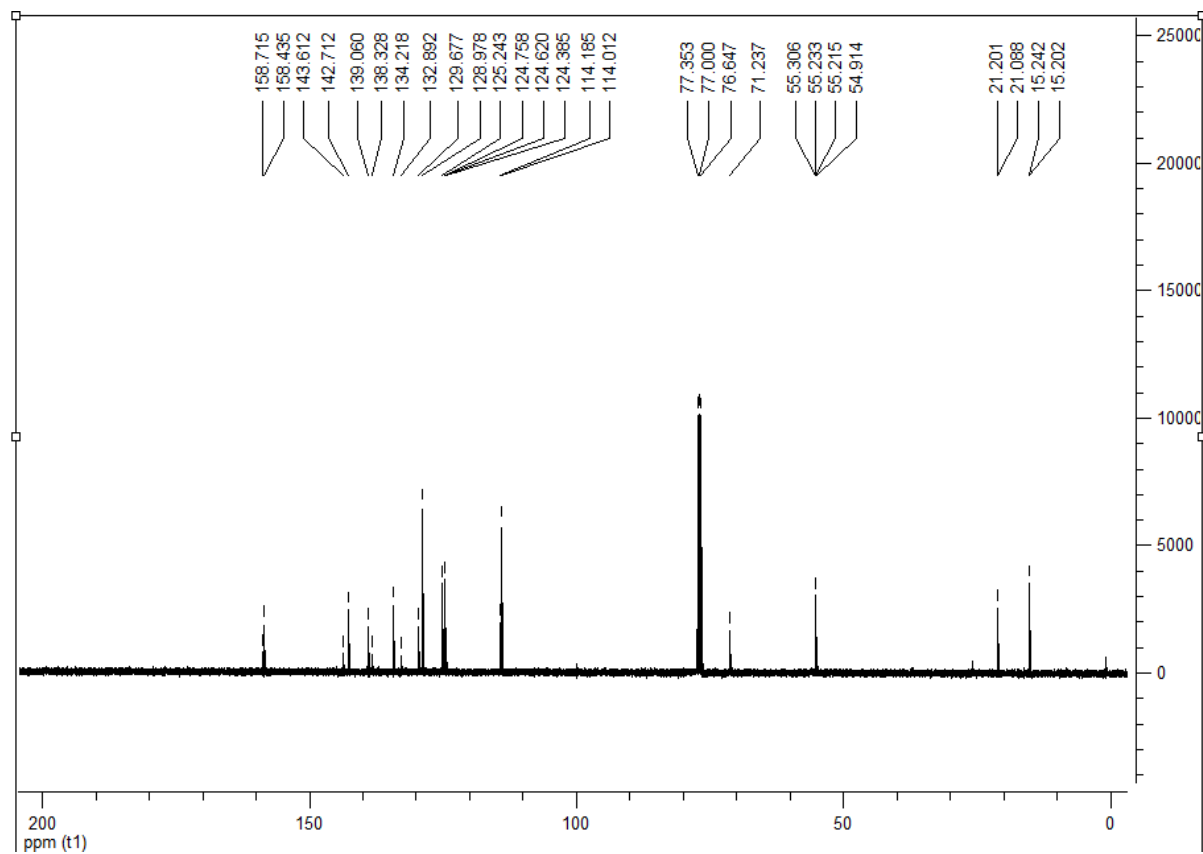

Supplement: c2ob25988e.pdf [file c2ob25988e.pdf]
